# Supplementary material for: Integrative Genome-Wide Gene Expression Profiling of Clear Cell Renal Cell Carcinoma in Czech Republic and in the United States
Source: PLoS One. 2013 Mar 5;8(3):e57886. doi: 10.1371/journal.pone.0057886 (PMC3589490; doi:10.1371/journal.pone.0057886)
Supplement: Table S7 — Complete list of statistically significant differentially expressed probes (FDR-adjusted p-value (BH) <0.05, FC ≥2) in grades 1–4 separately for ccRCC as compared with adjacent non-tumour tissues in Czech Republic (K2 series) – whole-genome expression profiling using microarrays. (XLSX) [file pone.0057886.s009.xlsx]

## Sheet: Sheet1
G1 DOWN	G2 DOWN	G3 DOWN	G4 DOWN	G1 UP	G2 UP	G3 UP	G4 UP
ILMN_2406151	ILMN_2406151	ILMN_2406151	ILMN_2406151	ILMN_1739792	ILMN_1661917	ILMN_1803788	ILMN_2139396
ILMN_1740585	ILMN_1740585	ILMN_1740585	ILMN_1740585	ILMN_2205963	ILMN_1775405	ILMN_3243573	ILMN_1750961
ILMN_1732149	ILMN_1732149	ILMN_1732149	ILMN_1732149	ILMN_2232478	ILMN_1802252	ILMN_1668559	ILMN_2406313
ILMN_2364072	ILMN_1753729	ILMN_1747716	ILMN_1747716	ILMN_1786823	ILMN_3240375	ILMN_1746465	ILMN_1740407
ILMN_1753729	ILMN_2124802	ILMN_2124802	ILMN_1735816	ILMN_3244457	ILMN_1749014	ILMN_1685009	ILMN_1738675
ILMN_1787576	ILMN_1715401	ILMN_1753729	ILMN_2408748	ILMN_2090105	ILMN_1669881	ILMN_1672124	ILMN_1694400
ILMN_2124802	ILMN_2364072	ILMN_2408748	ILMN_2364072	ILMN_1699489	ILMN_3241657	ILMN_1655987	ILMN_2255310
ILMN_1715401	ILMN_1787576	ILMN_1735816	ILMN_2124802	ILMN_3178302	ILMN_1801766	ILMN_3240316	ILMN_1652768
ILMN_1793182	ILMN_1793182	ILMN_2364072	ILMN_1793182	ILMN_1812618	ILMN_1779257	ILMN_1665736	ILMN_3299407
ILMN_1747716	ILMN_1782939	ILMN_1787576	ILMN_1753729	ILMN_1758315	ILMN_2114568	ILMN_1768394	ILMN_1658926
ILMN_1782939	ILMN_1747716	ILMN_1715401	ILMN_1787576	ILMN_1804530	ILMN_3226012	ILMN_1806908	ILMN_1768110
ILMN_1812073	ILMN_1812073	ILMN_1793182	ILMN_1715401	ILMN_1756862	ILMN_2370241	ILMN_2087646	ILMN_1666078
ILMN_1745688	ILMN_1711015	ILMN_1795166	ILMN_1795166	ILMN_1728934	ILMN_1730670	ILMN_1745954	ILMN_1740466
ILMN_1711015	ILMN_1743357	ILMN_1812073	ILMN_1693912	ILMN_1794707	ILMN_2042771	ILMN_1675939	ILMN_2355953
ILMN_1682763	ILMN_1659991	ILMN_1782939	ILMN_1782939	ILMN_1658407	ILMN_1717706	ILMN_1731233	ILMN_1873034
ILMN_2072568	ILMN_1682763	ILMN_1714446	ILMN_1732410	ILMN_3217172	ILMN_1664303	ILMN_1766925	ILMN_1764964
ILMN_1659991	ILMN_1777797	ILMN_2327860	ILMN_1662214	ILMN_2376455	ILMN_1744487	ILMN_1673522	ILMN_2237252
ILMN_1743357	ILMN_1714446	ILMN_1659991	ILMN_1659991	ILMN_3278506	ILMN_1712075	ILMN_2209748	ILMN_1711383
ILMN_1693912	ILMN_1795166	ILMN_1693912	ILMN_2228463	ILMN_2205999	ILMN_2176063	ILMN_2324994	ILMN_2222008
ILMN_1725597	ILMN_1745688	ILMN_1662214	ILMN_1766083	ILMN_1809467	ILMN_1774836	ILMN_1689004	ILMN_1676213
ILMN_1769547	ILMN_1725597	ILMN_1777797	ILMN_1714446	ILMN_1737406	ILMN_1750805	ILMN_2038778	ILMN_1800787
ILMN_1777797	ILMN_1693912	ILMN_1711015	ILMN_1812073	ILMN_1743032	ILMN_1765668	ILMN_1773389	ILMN_1660923
ILMN_1759910	ILMN_2072568	ILMN_1725597	ILMN_1683883	ILMN_1769118	ILMN_1682929	ILMN_1798654	ILMN_2399363
ILMN_1670779	ILMN_1769547	ILMN_1743357	ILMN_1711015	ILMN_1662358	ILMN_1805750	ILMN_2046730	ILMN_1719641
ILMN_1714446	ILMN_1749415	ILMN_1785284	ILMN_1657592	ILMN_1742167	ILMN_1718936	ILMN_2066060	ILMN_2409298
ILMN_2167252	ILMN_2408748	ILMN_1766083	ILMN_1785284	ILMN_1675939	ILMN_2254635	ILMN_1765146	ILMN_1743032
ILMN_1749415	ILMN_1662214	ILMN_1731948	ILMN_1731948	ILMN_1791771	ILMN_1727049	ILMN_1729801	ILMN_3236713
ILMN_2149164	ILMN_2357944	ILMN_1745688	ILMN_1729180	ILMN_2267914	ILMN_1744968	ILMN_1736567	ILMN_2403965
ILMN_2357944	ILMN_2149164	ILMN_1774375	ILMN_1745688	ILMN_1699265	ILMN_1777998	ILMN_2080080	ILMN_1769891
ILMN_1798742	ILMN_1735816	ILMN_2320330	ILMN_1725597	ILMN_3244583	ILMN_1661264	ILMN_1815184	ILMN_1691104
ILMN_1713995	ILMN_1683883	ILMN_2072568	ILMN_1769547	ILMN_1703477	ILMN_2404688	ILMN_2237252	ILMN_1745397
ILMN_1795166	ILMN_1708778	ILMN_1749415	ILMN_1743357	ILMN_1697499	ILMN_2255310	ILMN_2377900	ILMN_1676256
ILMN_2414786	ILMN_1759910	ILMN_1732410	ILMN_1815480	ILMN_1786176	ILMN_2414325	ILMN_2326953	ILMN_1751885
ILMN_1746676	ILMN_2414786	ILMN_1683883	ILMN_1774375	ILMN_1709820	ILMN_3243714	ILMN_2253732	ILMN_1909886
ILMN_1683883	ILMN_2167259	ILMN_2228463	ILMN_1746128	ILMN_1658356	ILMN_2148819	ILMN_2255310	ILMN_3242540
ILMN_1775170	ILMN_1798742	ILMN_1682763	ILMN_1777797	ILMN_1675936	ILMN_1690105	ILMN_1777325	ILMN_2366334
ILMN_1678186	ILMN_1670779	ILMN_1713995	ILMN_1682763	ILMN_1741148	ILMN_1727194	ILMN_1809590	ILMN_2064606
ILMN_2320330	ILMN_1718766	ILMN_2357944	ILMN_1691264	ILMN_1801766	ILMN_1666444	ILMN_1766539	ILMN_1798379
ILMN_1658519	ILMN_1727606	ILMN_1763196	ILMN_2414786	ILMN_1813836	ILMN_1800787	ILMN_1730628	ILMN_1771385
ILMN_1662214	ILMN_1748378	ILMN_1769547	ILMN_1815203	ILMN_1671703	ILMN_1750961	ILMN_1653039	ILMN_1671509
ILMN_2327860	ILMN_2167252	ILMN_1670779	ILMN_1734929	ILMN_1673129	ILMN_2055156	ILMN_1691341	ILMN_3240316
ILMN_1727606	ILMN_2327860	ILMN_1813350	ILMN_3246401	ILMN_2042771	ILMN_1652825	ILMN_2165354	ILMN_2349658
ILMN_1686573	ILMN_2395451	ILMN_1798742	ILMN_2390017	ILMN_1759326	ILMN_1809467	ILMN_2403965	ILMN_1720235
ILMN_1692938	ILMN_2390017	ILMN_2390017	ILMN_1749415	ILMN_2049536	ILMN_1755749	ILMN_1723035	ILMN_1805725
ILMN_2167259	ILMN_1785284	ILMN_1691264	ILMN_2167252	ILMN_1769779	ILMN_1691364	ILMN_2311761	ILMN_1713561
ILMN_1708778	ILMN_3236756	ILMN_1748378	ILMN_1735445	ILMN_1802205	ILMN_1728934	ILMN_1772521	ILMN_1736242
ILMN_1748378	ILMN_1658519	ILMN_1815480	ILMN_1714577	ILMN_1738992	ILMN_1694140	ILMN_1652185	ILMN_1725750
ILMN_3236756	ILMN_1746676	ILMN_1678186	ILMN_1708778	ILMN_1652826	ILMN_2044453	ILMN_1712532	ILMN_1737157
ILMN_1718766	ILMN_1678186	ILMN_2149164	ILMN_1686259	ILMN_3246433	ILMN_1814998	ILMN_1664024	ILMN_1695299
ILMN_1783756	ILMN_2320330	ILMN_1708778	ILMN_1684401	ILMN_2407389	ILMN_3239181	ILMN_1775405	ILMN_1746864
ILMN_1785284	ILMN_1725311	ILMN_1663569	ILMN_1656368	ILMN_1655612	ILMN_1677261	ILMN_1688749	ILMN_1719433
ILMN_1807894	ILMN_1686259	ILMN_2414786	ILMN_1763196	ILMN_1661755	ILMN_1803686	ILMN_1667791	ILMN_1658911
ILMN_2395451	ILMN_1713995	ILMN_3246328	ILMN_2072568	ILMN_1750961	ILMN_2393450	ILMN_1743836	ILMN_2317923
ILMN_2173611	ILMN_1783756	ILMN_1686259	ILMN_2296510	ILMN_2230892	ILMN_2366330	ILMN_1788203	ILMN_2041046
ILMN_2408748	ILMN_1731948	ILMN_1739001	ILMN_1670779	ILMN_1727194	ILMN_1760922	ILMN_1810910	ILMN_2066066
ILMN_1714577	ILMN_1692938	ILMN_1728799	ILMN_1731941	ILMN_2409167	ILMN_2079655	ILMN_1709880	ILMN_2209748
ILMN_1725311	ILMN_1766083	ILMN_1658519	ILMN_1668510	ILMN_1674036	ILMN_2377900	ILMN_1714170	ILMN_1769118
ILMN_2153837	ILMN_2173611	ILMN_2395451	ILMN_1765912	ILMN_3205656	ILMN_1651285	ILMN_1700031	ILMN_1709674
ILMN_2390017	ILMN_1807894	ILMN_1714577	ILMN_2327860	ILMN_2360710	ILMN_1653039	ILMN_1700025	ILMN_2226955
ILMN_1791123	ILMN_2153837	ILMN_1746676	ILMN_1748378	ILMN_2168217	ILMN_1799139	ILMN_1668039	ILMN_1710740
ILMN_3246328	ILMN_3246328	ILMN_1727606	ILMN_1658519	ILMN_1777325	ILMN_1699214	ILMN_1795251	ILMN_1724066
ILMN_1739001	ILMN_1775170	ILMN_1700831	ILMN_2149164	ILMN_1684795	ILMN_1780058	ILMN_2370241	ILMN_1709880
ILMN_1739126	ILMN_1728799	ILMN_1772894	ILMN_2357944	ILMN_1654609	ILMN_1790555	ILMN_1719256	ILMN_2109416
ILMN_1806754	ILMN_1739001	ILMN_2096985	ILMN_1802167	ILMN_1727045	ILMN_1665583	ILMN_1751444	ILMN_1718833
ILMN_1711928	ILMN_1813350	ILMN_3246401	ILMN_2167259	ILMN_1673352	ILMN_2368318	ILMN_2169966	ILMN_2142185
ILMN_1686259	ILMN_2353117	ILMN_1657592	ILMN_2395451	ILMN_1801504	ILMN_1699489	ILMN_1658911	ILMN_1733998
ILMN_1695193	ILMN_2405391	ILMN_1718766	ILMN_1809623	ILMN_2092118	ILMN_1667371	ILMN_1706841	ILMN_3192836
ILMN_1761946	ILMN_2096985	ILMN_1784040	ILMN_2096985	ILMN_1655987	ILMN_2307903	ILMN_2065773	ILMN_2183510
ILMN_1813350	ILMN_1711928	ILMN_1783756	ILMN_1783963	ILMN_2366634	ILMN_2120273	ILMN_1651346	ILMN_1655930
ILMN_1736190	ILMN_1761946	ILMN_1729180	ILMN_2352077	ILMN_2176063	ILMN_1751851	ILMN_1758939	ILMN_3242038
ILMN_2394287	ILMN_1782389	ILMN_1731941	ILMN_2405391	ILMN_1665943	ILMN_2066060	ILMN_1660793	ILMN_1702691
ILMN_2096985	ILMN_1683263	ILMN_2405391	ILMN_1728799	ILMN_1756071	ILMN_1668417	ILMN_1802708	ILMN_2096719
ILMN_1755582	ILMN_1663569	ILMN_1685387	ILMN_1700831	ILMN_3241446	ILMN_1757552	ILMN_1809467	ILMN_1670238
ILMN_1715301	ILMN_1686573	ILMN_2167252	ILMN_1767523	ILMN_1751559	ILMN_1698001	ILMN_2186137	ILMN_1746565
ILMN_1735816	ILMN_1656368	ILMN_3236756	ILMN_1770725	ILMN_3256478	ILMN_1812902	ILMN_1760062	ILMN_1702171
ILMN_2178492	ILMN_1739126	ILMN_1656638	ILMN_1794951	ILMN_2408851	ILMN_1665877	ILMN_1718552	ILMN_2168217
ILMN_1766083	ILMN_1806754	ILMN_1746128	ILMN_1772894	ILMN_1775734	ILMN_1702691	ILMN_1740407	ILMN_1737314
ILMN_1652037	ILMN_1671791	ILMN_1725311	ILMN_1798742	ILMN_1677085	ILMN_1802708	ILMN_2355953	ILMN_1719236
ILMN_1696099	ILMN_1681437	ILMN_2352077	ILMN_3236756	ILMN_1699852	ILMN_1695851	ILMN_1671054	ILMN_3235148
ILMN_1739050	ILMN_1691156	ILMN_1802167	ILMN_1707169	ILMN_1779257	ILMN_2131177	ILMN_3242038	ILMN_1761797
ILMN_1683263	ILMN_1739050	ILMN_1668510	ILMN_2411317	ILMN_1678454	ILMN_1710906	ILMN_1744212	ILMN_1787026
ILMN_2353117	ILMN_1692517	ILMN_2167259	ILMN_1685387	ILMN_1651557	ILMN_1707627	ILMN_1688780	ILMN_1701514
ILMN_1692517	ILMN_1738414	ILMN_1794951	ILMN_2320330	ILMN_2371280	ILMN_1717909	ILMN_1683179	ILMN_1769876
ILMN_1782389	ILMN_1791123	ILMN_1770725	ILMN_1735386	ILMN_2406501	ILMN_1763000	ILMN_2382990	ILMN_1739645
ILMN_3241522	ILMN_2228463	ILMN_2296510	ILMN_1718766	ILMN_1739428	ILMN_1764964	ILMN_1738992	ILMN_1681503
ILMN_1794875	ILMN_1652037	ILMN_1707169	ILMN_1783756	ILMN_3242586	ILMN_1775268	ILMN_3226012	ILMN_2350634
ILMN_1671791	ILMN_1715301	ILMN_1656368	ILMN_1755582	ILMN_1661917	ILMN_2101885	ILMN_2115434	ILMN_1660832
ILMN_1751785	ILMN_1679011	ILMN_1734929	ILMN_1663569	ILMN_2186061	ILMN_2145116	ILMN_1754798	ILMN_1760062
ILMN_1728799	ILMN_1714577	ILMN_1735445	ILMN_2181064	ILMN_1653498	ILMN_1690963	ILMN_1764964	ILMN_1658494
ILMN_1681437	ILMN_1794875	ILMN_1715301	ILMN_1695193	ILMN_2388800	ILMN_1700183	ILMN_1660501	ILMN_1663195
ILMN_2405391	ILMN_1736190	ILMN_1779448	ILMN_1757477	ILMN_1696463	ILMN_2125747	ILMN_1690963	ILMN_1730622
ILMN_2069224	ILMN_3241522	ILMN_3239643	ILMN_3246328	ILMN_1678215	ILMN_1706643	ILMN_1692295	ILMN_1796417
ILMN_1679011	ILMN_1687848	ILMN_1809623	ILMN_1759910	ILMN_1653203	ILMN_1668092	ILMN_1731745	ILMN_2091310
ILMN_1762531	ILMN_1762531	ILMN_2323508	ILMN_1794875	ILMN_1745075	ILMN_1749070	ILMN_2401057	ILMN_1813338
ILMN_1738414	ILMN_1696099	ILMN_1794875	ILMN_1749324	ILMN_1777565	ILMN_1668039	ILMN_1739170	ILMN_2399827
ILMN_1814215	ILMN_2079890	ILMN_1693270	ILMN_1713995	ILMN_1693014	ILMN_3297126	ILMN_1743620	ILMN_2339294
ILMN_1753026	ILMN_1814215	ILMN_1759910	ILMN_1715301	ILMN_2410826	ILMN_1803423	ILMN_1698367	ILMN_1801795
ILMN_1656368	ILMN_1753026	ILMN_1686573	ILMN_1656638	ILMN_1699980	ILMN_3235853	ILMN_1702636	ILMN_1723912
ILMN_2347145	ILMN_2394287	ILMN_2353117	ILMN_1746676	ILMN_1652065	ILMN_1812968	ILMN_2368318	ILMN_1758067
ILMN_2415421	ILMN_3209070	ILMN_1739126	ILMN_1678186	ILMN_1690105	ILMN_1723706	ILMN_2230892	ILMN_2098616
ILMN_1691156	ILMN_1693270	ILMN_2160210	ILMN_1696099	ILMN_1662026	ILMN_1790692	ILMN_1723706	ILMN_1695658
ILMN_3275388	ILMN_1680874	ILMN_1735386	ILMN_3239643	ILMN_1802653	ILMN_2392043	ILMN_1694400	ILMN_1759097
ILMN_3241953	ILMN_1782204	ILMN_1806754	ILMN_1788118	ILMN_1712075	ILMN_1733538	ILMN_2360730	ILMN_1656938
ILMN_2323508	ILMN_1732410	ILMN_1696099	ILMN_2353117	ILMN_1703538	ILMN_1801504	ILMN_1714820	ILMN_2260991
ILMN_1787266	ILMN_3241953	ILMN_1807894	ILMN_2323508	ILMN_1722898	ILMN_2206722	ILMN_1792473	ILMN_1740633
ILMN_1782204	ILMN_1676383	ILMN_1652037	ILMN_1721818	ILMN_1787509	ILMN_1653504	ILMN_1743032	ILMN_1681301
ILMN_3209070	ILMN_2178492	ILMN_2173611	ILMN_1652037	ILMN_2392043	ILMN_1700067	ILMN_1749070	ILMN_1700025
ILMN_2244841	ILMN_1707169	ILMN_1738414	ILMN_1740443	ILMN_2148459	ILMN_2285996	ILMN_2317923	ILMN_1758939
ILMN_1690733	ILMN_3275388	ILMN_1684401	ILMN_1807894	ILMN_2087656	ILMN_3243238	ILMN_1776516	ILMN_2304512
ILMN_1731948	ILMN_1774375	ILMN_2394287	ILMN_1755203	ILMN_2132809	ILMN_1716608	ILMN_3203444	ILMN_1689968
ILMN_1661491	ILMN_1690733	ILMN_1687848	ILMN_1795779	ILMN_2059535	ILMN_3241234	ILMN_1768577	ILMN_1766408
ILMN_2079890	ILMN_2069224	ILMN_1765912	ILMN_1708580	ILMN_1664094	ILMN_1713529	ILMN_1787844	ILMN_2115434
ILMN_1676383	ILMN_1685194	ILMN_1722716	ILMN_1767113	ILMN_3248910	ILMN_1756937	ILMN_1657892	ILMN_1733579
ILMN_1788942	ILMN_1716803	ILMN_1695193	ILMN_1675756	ILMN_1694140	ILMN_1739508	ILMN_1695299	ILMN_1798654
ILMN_1775566	ILMN_1755582	ILMN_1740402	ILMN_1813350	ILMN_1760509	ILMN_1666594	ILMN_1714158	ILMN_1697554
ILMN_1774375	ILMN_2415421	ILMN_2079890	ILMN_1739050	ILMN_1674782	ILMN_1693552	ILMN_3261938	ILMN_2404688
ILMN_1770725	ILMN_1731941	ILMN_1755582	ILMN_2173611	ILMN_1768394	ILMN_1802411	ILMN_1750961	ILMN_1734878
ILMN_1679646	ILMN_1679646	ILMN_3249032	ILMN_1795190	ILMN_1710906	ILMN_1661366	ILMN_1898124	ILMN_2264011
ILMN_2160210	ILMN_1678170	ILMN_2411317	ILMN_2213297	ILMN_1704750	ILMN_2329429	ILMN_2370208	ILMN_1653498
ILMN_3246401	ILMN_1751785	ILMN_1739050	ILMN_1711928	ILMN_3238196	ILMN_1660200	ILMN_1723522	ILMN_2163873
ILMN_1674353	ILMN_2244841	ILMN_1711928	ILMN_1700268	ILMN_1717934	ILMN_1700025	ILMN_1672589	ILMN_1810420
ILMN_1731783	ILMN_1685703	ILMN_1783963	ILMN_1678170	ILMN_1716465	ILMN_1734276	ILMN_2308849	ILMN_1716687
ILMN_1685194	ILMN_3239643	ILMN_2181064	ILMN_1664350	ILMN_1766054	ILMN_1810431	ILMN_1752932	ILMN_2083469
ILMN_1730229	ILMN_2347145	ILMN_1767523	ILMN_2145396	ILMN_1781636	ILMN_1766411	ILMN_1726589	ILMN_1713505
ILMN_1700268	ILMN_1689200	ILMN_1788118	ILMN_1727606	ILMN_1735014	ILMN_2331231	ILMN_1688959	ILMN_1657803
ILMN_1760950	ILMN_1730229	ILMN_1755203	ILMN_1810233	ILMN_1880052	ILMN_1732296	ILMN_1676899	ILMN_2336609
ILMN_1663569	ILMN_1695193	ILMN_1721818	ILMN_2228180	ILMN_1810628	ILMN_2232478	ILMN_2110908	ILMN_2165354
ILMN_1795779	ILMN_1795779	ILMN_1757477	ILMN_1739126	ILMN_2345898	ILMN_1756049	ILMN_1791726	ILMN_1664303
ILMN_1680874	ILMN_1777591	ILMN_1672605	ILMN_1735996	ILMN_2388547	ILMN_1701947	ILMN_1676256	ILMN_1766925
ILMN_2228463	ILMN_1735445	ILMN_1762531	ILMN_1726666	ILMN_2255310	ILMN_1780533	ILMN_2212909	ILMN_2406501
ILMN_1687848	ILMN_1802167	ILMN_1751785	ILMN_2415421	ILMN_2148819	ILMN_1706841	ILMN_2388547	ILMN_1713751
ILMN_3249032	ILMN_1731783	ILMN_1795779	ILMN_1775170	ILMN_1742846	ILMN_1677827	ILMN_1805410	ILMN_1761464
ILMN_1748352	ILMN_1740402	ILMN_1675756	ILMN_1717248	ILMN_1723048	ILMN_1719627	ILMN_1728512	ILMN_3305475
ILMN_1740402	ILMN_1661491	ILMN_2095597	ILMN_1740402	ILMN_3235148	ILMN_1702636	ILMN_2218208	ILMN_2401057
ILMN_1735996	ILMN_1760950	ILMN_1676383	ILMN_1755897	ILMN_1758164	ILMN_2090105	ILMN_1773963	ILMN_1727284
ILMN_1685387	ILMN_1797154	ILMN_1740443	ILMN_1722716	ILMN_1791576	ILMN_2205999	ILMN_3253456	ILMN_3275106
ILMN_1736527	ILMN_1672605	ILMN_1791123	ILMN_2244841	ILMN_2307861	ILMN_1667791	ILMN_1665877	ILMN_1674036
ILMN_1779616	ILMN_1729180	ILMN_1782389	ILMN_1671791	ILMN_1744212	ILMN_1792506	ILMN_1764714	ILMN_1746465
ILMN_1797154	ILMN_1794951	ILMN_3241522	ILMN_1801743	ILMN_2196078	ILMN_1796316	ILMN_1691892	ILMN_1734653
ILMN_1777644	ILMN_1784040	ILMN_1811345	ILMN_1797154	ILMN_1775268	ILMN_1803429	ILMN_2194577	ILMN_1717262
ILMN_2148469	ILMN_3239925	ILMN_1679646	ILMN_3251423	ILMN_1783909	ILMN_1758146	ILMN_1684306	ILMN_1719256
ILMN_1678170	ILMN_2323508	ILMN_1685703	ILMN_1679194	ILMN_1796349	ILMN_2359907	ILMN_1701017	ILMN_1792473
ILMN_1707169	ILMN_1807339	ILMN_1753026	ILMN_1709237	ILMN_2148913	ILMN_1809928	ILMN_1666894	ILMN_3253456
ILMN_1651568	ILMN_1788942	ILMN_3275388	ILMN_3251497	ILMN_1761463	ILMN_1722898	ILMN_1756937	ILMN_3284584
ILMN_1777591	ILMN_1685387	ILMN_1746801	ILMN_1664738	ILMN_1745963	ILMN_1796349	ILMN_2087656	ILMN_1811387
ILMN_1740443	ILMN_1783963	ILMN_1749324	ILMN_3241522	ILMN_2388070	ILMN_1683026	ILMN_1764577	ILMN_1701947
ILMN_3310491	ILMN_1709796	ILMN_3209070	ILMN_1691503	ILMN_2046730	ILMN_2066858	ILMN_3247506	ILMN_1744347
ILMN_1716803	ILMN_1674353	ILMN_1815203	ILMN_1779448	ILMN_2340259	ILMN_2373062	ILMN_1756049	ILMN_1661264
ILMN_1729180	ILMN_1763196	ILMN_1661733	ILMN_3275388	ILMN_1801246	ILMN_2297765	ILMN_2412192	ILMN_1770673
ILMN_1805104	ILMN_2296510	ILMN_1679011	ILMN_1811345	ILMN_1691339	ILMN_1736567	ILMN_1751726	ILMN_2148819
ILMN_1739594	ILMN_1770725	ILMN_1761946	ILMN_1717674	ILMN_3297126	ILMN_1701731	ILMN_2414325	ILMN_1657892
ILMN_1815203	ILMN_1669114	ILMN_1708341	ILMN_1692517	ILMN_2170209	ILMN_1782560	ILMN_1807423	ILMN_1683026
ILMN_1754491	ILMN_1745817	ILMN_2244841	ILMN_3239925	ILMN_1760315	ILMN_3237961	ILMN_1775486	ILMN_2368318
ILMN_1807339	ILMN_1805104	ILMN_1692517	ILMN_1723443	ILMN_1730622	ILMN_2413808	ILMN_3245057	ILMN_1803560
ILMN_1693270	ILMN_1691264	ILMN_1685194	ILMN_1682326	ILMN_1666444	ILMN_1800276	ILMN_1689578	ILMN_1685009
ILMN_1776363	ILMN_1739594	ILMN_1767113	ILMN_1736190	ILMN_2353633	ILMN_1724658	ILMN_2112417	ILMN_1772521
ILMN_1685703	ILMN_1682326	ILMN_1681437	ILMN_1777591	ILMN_2188333	ILMN_1764577	ILMN_1669113	ILMN_1815184
ILMN_1810275	ILMN_1661994	ILMN_1681103	ILMN_1800008	ILMN_1672503	ILMN_1804530	ILMN_1808777	ILMN_1775486
ILMN_1738921	ILMN_1749324	ILMN_3243598	ILMN_1687848	ILMN_1668039	ILMN_1796629	ILMN_3178302	ILMN_1744212
ILMN_1717674	ILMN_1779616	ILMN_1776519	ILMN_1808677	ILMN_1669982	ILMN_1703852	ILMN_1659106	ILMN_1800091
ILMN_1784040	ILMN_1651568	ILMN_1682326	ILMN_1753026	ILMN_3241657	ILMN_2086105	ILMN_1665943	ILMN_1759326
ILMN_3285762	ILMN_2148469	ILMN_1695157	ILMN_1708341	ILMN_1742618	ILMN_2366634	ILMN_1694213	ILMN_1651346
ILMN_3239643	ILMN_1656638	ILMN_1736190	ILMN_1725311	ILMN_2222074	ILMN_2085760	ILMN_1723912	ILMN_1768391
ILMN_1811345	ILMN_1775566	ILMN_1740426	ILMN_1779616	ILMN_1694432	ILMN_3304898	ILMN_2056032	ILMN_1762825
ILMN_1760649	ILMN_1700268	ILMN_1667018	ILMN_1670325	ILMN_1797875	ILMN_1708375	ILMN_1697309	ILMN_1703477
ILMN_1672605	ILMN_1811345	ILMN_2153837	ILMN_1667018	ILMN_1704101	ILMN_3294335	ILMN_1802653	ILMN_1772131
ILMN_2104295	ILMN_1664464	ILMN_1735996	ILMN_1776519	ILMN_1740407	ILMN_1672650	ILMN_1873034	ILMN_1686981
ILMN_1802167	ILMN_2160210	ILMN_3241953	ILMN_1661733	ILMN_1803686	ILMN_1796712	ILMN_1810420	ILMN_1672124
ILMN_1719906	ILMN_1669802	ILMN_2213297	ILMN_1810684	ILMN_1667948	ILMN_1763433	ILMN_1771385	ILMN_1752592
ILMN_1731941	ILMN_1777644	ILMN_2145396	ILMN_1763837	ILMN_2412214	ILMN_1769779	ILMN_1698001	ILMN_1666894
ILMN_1781013	ILMN_2185427	ILMN_1671791	ILMN_1686573	ILMN_3284584	ILMN_1688848	ILMN_1734476	ILMN_1806037
ILMN_1669802	ILMN_1810275	ILMN_1795190	ILMN_1784040	ILMN_1798975	ILMN_1663916	ILMN_1721022	ILMN_1780546
ILMN_1697460	ILMN_1697460	ILMN_1797154	ILMN_1782937	ILMN_1717706	ILMN_1813314	ILMN_1662427	ILMN_3226012
ILMN_2136089	ILMN_1717674	ILMN_1655261	ILMN_3243598	ILMN_1713529	ILMN_2170209	ILMN_1777998	ILMN_2049536
ILMN_3308961	ILMN_1738921	ILMN_1801743	ILMN_1739001	ILMN_2253732	ILMN_1703108	ILMN_2145116	ILMN_1741148
ILMN_1763196	ILMN_3246401	ILMN_1664350	ILMN_2394287	ILMN_1815673	ILMN_1682312	ILMN_1734543	ILMN_1768394
ILMN_1669114	ILMN_1668510	ILMN_2178492	ILMN_1723123	ILMN_1778240	ILMN_2347592	ILMN_2079655	ILMN_1810852
ILMN_1655261	ILMN_1753101	ILMN_1782204	ILMN_3209070	ILMN_1699856	ILMN_1767448	ILMN_1716909	ILMN_2081682
ILMN_1682326	ILMN_1787266	ILMN_1777591	ILMN_1656977	ILMN_1667791	ILMN_3200384	ILMN_1654109	ILMN_1721022
ILMN_1718132	ILMN_1767711	ILMN_1717248	ILMN_1701636	ILMN_1717262	ILMN_1673363	ILMN_1710906	ILMN_3243644
ILMN_1732410	ILMN_1748352	ILMN_1723123	ILMN_1676383	ILMN_1721113	ILMN_1784110	ILMN_2232854	ILMN_1712532
ILMN_1745817	ILMN_1736184	ILMN_1755897	ILMN_1760950	ILMN_1660554	ILMN_2169801	ILMN_2376455	ILMN_1766054
ILMN_3251540	ILMN_1754491	ILMN_2415421	ILMN_1693270	ILMN_1729801	ILMN_2409167	ILMN_1679133	ILMN_1783593
ILMN_1690621	ILMN_1815203	ILMN_1661994	ILMN_1805104	ILMN_2109489	ILMN_3217172	ILMN_3244457	ILMN_2230892
ILMN_1687971	ILMN_1735996	ILMN_1805104	ILMN_1746801	ILMN_1771376	ILMN_1802441	ILMN_1652082	ILMN_3247797
ILMN_1661994	ILMN_3249032	ILMN_1689200	ILMN_1655613	ILMN_2398159	ILMN_1660554	ILMN_1810852	ILMN_1737163
ILMN_1735445	ILMN_1707670	ILMN_1762410	ILMN_1776363	ILMN_1737076	ILMN_2115005	ILMN_3248773	ILMN_2044453
ILMN_2296510	ILMN_2352077	ILMN_1805665	ILMN_1692938	ILMN_1774087	ILMN_1674036	ILMN_1676361	ILMN_2112417
ILMN_1657746	ILMN_1767113	ILMN_1691503	ILMN_1754247	ILMN_1811238	ILMN_1742544	ILMN_1677684	ILMN_1787345
ILMN_3305273	ILMN_1736527	ILMN_1709237	ILMN_1761946	ILMN_1711899	ILMN_1756417	ILMN_1699852	ILMN_1738992
ILMN_1810233	ILMN_1740443	ILMN_1679194	ILMN_2113470	ILMN_3243644	ILMN_1800261	ILMN_1803560	ILMN_2360730
ILMN_1722716	ILMN_1718132	ILMN_2228180	ILMN_1666972	ILMN_1755657	ILMN_2406501	ILMN_1711994	ILMN_1717261
ILMN_2056606	ILMN_2136089	ILMN_1779616	ILMN_2365176	ILMN_1770922	ILMN_2267914	ILMN_2041101	ILMN_1758146
ILMN_1719616	ILMN_1776519	ILMN_1738921	ILMN_1730229	ILMN_1769383	ILMN_1704554	ILMN_1721113	ILMN_2360710
ILMN_1770653	ILMN_1722716	ILMN_1788942	ILMN_1791123	ILMN_1673899	ILMN_1754798	ILMN_1703692	ILMN_1791296
ILMN_1666972	ILMN_1719616	ILMN_1753101	ILMN_1836218	ILMN_1690963	ILMN_1652631	ILMN_1653042	ILMN_1790891
ILMN_1686291	ILMN_1719906	ILMN_1690733	ILMN_1750062	ILMN_2131177	ILMN_1784320	ILMN_1748473	ILMN_1779252
ILMN_1689200	ILMN_3310491	ILMN_2346339	ILMN_1762531	ILMN_2055156	ILMN_2390919	ILMN_2120273	ILMN_1807372
ILMN_1664565	ILMN_1776363	ILMN_1736184	ILMN_1657746	ILMN_2056032	ILMN_1697561	ILMN_1677603	ILMN_1786139
ILMN_1668510	ILMN_1721818	ILMN_1683263	ILMN_1701831	ILMN_3294335	ILMN_3217815	ILMN_2088437	ILMN_1790692
ILMN_1746801	ILMN_1657746	ILMN_1666972	ILMN_1762410	ILMN_1658289	ILMN_1798706	ILMN_1703108	ILMN_1800276
ILMN_1808677	ILMN_3247438	ILMN_1810233	ILMN_1681437	ILMN_1746465	ILMN_1736863	ILMN_1716859	ILMN_1794782
ILMN_1684158	ILMN_1760649	ILMN_1716803	ILMN_1672605	ILMN_1740633	ILMN_1844464	ILMN_1665583	ILMN_1805410
ILMN_2064150	ILMN_1690621	ILMN_1775170	ILMN_2197381	ILMN_2399827	ILMN_2112417	ILMN_2074477	ILMN_2335704
ILMN_1671489	ILMN_1701497	ILMN_1680874	ILMN_1722869	ILMN_1730670	ILMN_1676893	ILMN_2112256	ILMN_1758315
ILMN_1767523	ILMN_1836218	ILMN_1730229	ILMN_2316918	ILMN_1794742	ILMN_1742450	ILMN_3248910	ILMN_1665943
ILMN_3251423	ILMN_1664565	ILMN_2187746	ILMN_2178492	ILMN_2066060	ILMN_1697268	ILMN_2201678	ILMN_2330861
ILMN_1776519	ILMN_2095597	ILMN_1763837	ILMN_2168747	ILMN_2230025	ILMN_1805192	ILMN_1810172	ILMN_3247506
ILMN_1740917	ILMN_1666972	ILMN_1661491	ILMN_1789653	ILMN_2359907	ILMN_2264011	ILMN_2148819	ILMN_1703330
ILMN_2185427	ILMN_1758323	ILMN_2148469	ILMN_1738414	ILMN_1764964	ILMN_1656920	ILMN_1909886	ILMN_1760201
ILMN_2051972	ILMN_1744929	ILMN_1657746	ILMN_1738921	ILMN_1769891	ILMN_2218277	ILMN_1813338	ILMN_1730612
ILMN_1691572	ILMN_2064150	ILMN_1664738	ILMN_1748983	ILMN_3232894	ILMN_2230025	ILMN_1742789	ILMN_1665877
ILMN_2162819	ILMN_3305273	ILMN_3239925	ILMN_2188722	ILMN_1742450	ILMN_1671054	ILMN_1791771	ILMN_1691053
ILMN_1795976	ILMN_1767474	ILMN_1691156	ILMN_3310491	ILMN_1662843	ILMN_3245057	ILMN_1814998	ILMN_2414325
ILMN_2095597	ILMN_1740917	ILMN_1690621	ILMN_1699258	ILMN_2206722	ILMN_1667966	ILMN_1766054	ILMN_1898124
ILMN_2415189	ILMN_1704537	ILMN_1800130	ILMN_1701603	ILMN_1769575	ILMN_1806165	ILMN_1738989	ILMN_1731745
ILMN_1664464	ILMN_1686291	ILMN_2064150	ILMN_3251540	ILMN_2109416	ILMN_3269537	ILMN_2082273	ILMN_2054019
ILMN_1733333	ILMN_1795976	ILMN_1798496	ILMN_1795872	ILMN_1668417	ILMN_1751028	ILMN_1739792	ILMN_1661196
ILMN_1767474	ILMN_1779448	ILMN_1719250	ILMN_1811933	ILMN_1813206	ILMN_1660364	ILMN_1760509	ILMN_3211079
ILMN_2407346	ILMN_2411317	ILMN_2069224	ILMN_1813741	ILMN_1713751	ILMN_1699574	ILMN_1683450	ILMN_2372974
ILMN_1737152	ILMN_2104295	ILMN_1760950	ILMN_1685194	ILMN_1798181	ILMN_1667430	ILMN_1658044	ILMN_1683450
ILMN_2168747	ILMN_3308961	ILMN_1678170	ILMN_1661491	ILMN_1677261	ILMN_2096719	ILMN_1739496	ILMN_3285611
ILMN_1709796	ILMN_1688886	ILMN_1767711	ILMN_1655261	ILMN_1679262	ILMN_2360730	ILMN_1653466	ILMN_1682775
ILMN_1684922	ILMN_1675756	ILMN_1730977	ILMN_1679011	ILMN_3200384	ILMN_2341229	ILMN_1723962	ILMN_1807106
ILMN_3247438	ILMN_2056606	ILMN_3310491	ILMN_2095597	ILMN_1691376	ILMN_2063168	ILMN_1796245	ILMN_2350574
ILMN_1772809	ILMN_1671489	ILMN_1674353	ILMN_1714384	ILMN_1698001	ILMN_3250257	ILMN_1780334	ILMN_1748473
ILMN_1778687	ILMN_1746801	ILMN_1717674	ILMN_2079890	ILMN_2105441	ILMN_1726720	ILMN_1654324	ILMN_1807439
ILMN_1767711	ILMN_1740418	ILMN_1714384	ILMN_1807633	ILMN_2370976	ILMN_1768483	ILMN_1660021	ILMN_1676528
ILMN_1771084	ILMN_1755203	ILMN_1708580	ILMN_1802131	ILMN_1717909	ILMN_1769520	ILMN_2115005	ILMN_3178302
ILMN_2352077	ILMN_1781013	ILMN_1669114	ILMN_1690733	ILMN_1805175	ILMN_1695763	ILMN_2345898	ILMN_1743103
ILMN_1661733	ILMN_1696318	ILMN_1810684	ILMN_2153837	ILMN_1752591	ILMN_1711617	ILMN_1713901	ILMN_1775405
ILMN_1701497	ILMN_1731670	ILMN_3251423	ILMN_1751232	ILMN_3240375	ILMN_1702301	ILMN_1722820	ILMN_1724941
ILMN_1783963	ILMN_2145396	ILMN_1808677	ILMN_1690621	ILMN_1763000	ILMN_1790859	ILMN_1796712	ILMN_1777998
ILMN_2411317	ILMN_1765310	ILMN_1736527	ILMN_1773073	ILMN_1802708	ILMN_2122103	ILMN_1751851	ILMN_1738989
ILMN_1740418	ILMN_1657592	ILMN_1692938	ILMN_2304404	ILMN_2081682	ILMN_1701195	ILMN_1801939	ILMN_1676289
ILMN_1785095	ILMN_1808677	ILMN_1750062	ILMN_1689200	ILMN_1744963	ILMN_2054019	ILMN_1701947	ILMN_3249748
ILMN_1765310	ILMN_2185884	ILMN_2315789	ILMN_1805665	ILMN_2351466	ILMN_3278506	ILMN_1702691	ILMN_1718936
ILMN_1801743	ILMN_1717248	ILMN_2104295	ILMN_1691156	ILMN_1782560	ILMN_2082209	ILMN_1759326	ILMN_2413779
ILMN_2406634	ILMN_1691572	ILMN_1767474	ILMN_1685703	ILMN_1756049	ILMN_1701514	ILMN_2367020	ILMN_1742866
ILMN_1748983	ILMN_1700831	ILMN_1694535	ILMN_1701507	ILMN_1784661	ILMN_1775486	ILMN_1737683	ILMN_1736042
ILMN_1736184	ILMN_1801743	ILMN_1765310	ILMN_1690979	ILMN_1667371	ILMN_1716276	ILMN_2101885	ILMN_1742450
ILMN_1800130	ILMN_1737152	ILMN_1731783	ILMN_1679646	ILMN_2329927	ILMN_1723684	ILMN_2352303	ILMN_1704750
ILMN_2151281	ILMN_2051972	ILMN_1701636	ILMN_2162819	ILMN_1703433	ILMN_1728512	ILMN_1691508	ILMN_1666444
ILMN_1801443	ILMN_1767523	ILMN_1812070	ILMN_1748323	ILMN_1805750	ILMN_1721113	ILMN_2408851	ILMN_2311761
ILMN_1794951	ILMN_2415189	ILMN_3247438	ILMN_1734897	ILMN_1775486	ILMN_1797875	ILMN_1659075	ILMN_1806040
ILMN_2340347	ILMN_1788118	ILMN_1701603	ILMN_2103024	ILMN_1781285	ILMN_2410924	ILMN_1711617	ILMN_1674034
ILMN_1755897	ILMN_1757387	ILMN_1912287	ILMN_1782204	ILMN_1723706	ILMN_1719433	ILMN_1784320	ILMN_1743836
ILMN_1788118	ILMN_2218104	ILMN_1754491	ILMN_1755720	ILMN_1802411	ILMN_2208413	ILMN_1669881	ILMN_1775743
ILMN_1757387	ILMN_1733333	ILMN_2237428	ILMN_1691572	ILMN_1765701	ILMN_1760062	ILMN_2331232	ILMN_2336781
ILMN_1763837	ILMN_1655261	ILMN_1669802	ILMN_2396903	ILMN_1653504	ILMN_3241262	ILMN_1762825	ILMN_1756049
ILMN_1679194	ILMN_1730454	ILMN_1697460	ILMN_1718132	ILMN_2366330	ILMN_1781636	ILMN_1782788	ILMN_1684306
ILMN_1731670	ILMN_1800130	ILMN_1800008	ILMN_3241953	ILMN_1706434	ILMN_1776678	ILMN_2379644	ILMN_1773963
ILMN_1707464	ILMN_1757477	ILMN_1814215	ILMN_1717853	ILMN_1689578	ILMN_1766551	ILMN_1343295	ILMN_1699265
ILMN_1657592	ILMN_3251423	ILMN_1718132	ILMN_1717888	ILMN_2155816	ILMN_1723962	ILMN_2208413	ILMN_1708375
ILMN_1746128	ILMN_1763837	ILMN_1722869	ILMN_1806754	ILMN_3237961	ILMN_1734543	ILMN_1732538	ILMN_1677684
ILMN_2311020	ILMN_2228180	ILMN_2407346	ILMN_1719906	ILMN_1751028	ILMN_1732923	ILMN_1701731	ILMN_1667460
ILMN_1815308	ILMN_1684401	ILMN_1728570	ILMN_2070521	ILMN_3243714	ILMN_1775327	ILMN_1712431	ILMN_1790778
ILMN_2357334	ILMN_1684922	ILMN_1802131	ILMN_1751785	ILMN_1784110	ILMN_2232177	ILMN_2372974	ILMN_1791771
ILMN_1792182	ILMN_2099259	ILMN_2396903	ILMN_1669802	ILMN_2415235	ILMN_2383934	ILMN_1815500	ILMN_1710434
ILMN_1696318	ILMN_2407346	ILMN_1813741	ILMN_2160210	ILMN_1670379	ILMN_1686097	ILMN_1764629	ILMN_1815169
ILMN_3239925	ILMN_2406634	ILMN_1656977	ILMN_2346339	ILMN_1743836	ILMN_1750974	ILMN_1800091	ILMN_1810725
ILMN_1721818	ILMN_1687971	ILMN_1811933	ILMN_1716803	ILMN_1701947	ILMN_1802106	ILMN_1761463	ILMN_1802192
ILMN_1764175	ILMN_1684158	ILMN_2162819	ILMN_1709796	ILMN_1780058	ILMN_1736700	ILMN_1699489	ILMN_2058782
ILMN_1707670	ILMN_2166457	ILMN_1719906	ILMN_1707464	ILMN_2364521	ILMN_2412214	ILMN_1667081	ILMN_1714820
ILMN_1753101	ILMN_1749403	ILMN_1739813	ILMN_1718483	ILMN_1671054	ILMN_1704101	ILMN_3304898	ILMN_1689655
ILMN_2346339	ILMN_1785095	ILMN_1690040	ILMN_1687306	ILMN_1701195	ILMN_1747195	ILMN_1658407	ILMN_2198413
ILMN_2145396	ILMN_1679194	ILMN_1730454	ILMN_1769556	ILMN_1731233	ILMN_2352303	ILMN_1753111	ILMN_1781285
ILMN_1766499	ILMN_1746128	ILMN_1751232	ILMN_1788942	ILMN_2254635	ILMN_1701114	ILMN_1800261	ILMN_1699071
ILMN_1746883	ILMN_1766499	ILMN_1836218	ILMN_1714397	ILMN_1680274	ILMN_1812477	ILMN_1780058	ILMN_2359710
ILMN_1740960	ILMN_1755897	ILMN_1677384	ILMN_2052373	ILMN_1699071	ILMN_1658926	ILMN_2388070	ILMN_1662427
ILMN_1749324	ILMN_3285762	ILMN_1776363	ILMN_1665775	ILMN_1730710	ILMN_2399827	ILMN_1660027	ILMN_2232177
ILMN_1770641	ILMN_1723418	ILMN_1686291	ILMN_1795257	ILMN_1659075	ILMN_2308849	ILMN_1661264	ILMN_2079655
ILMN_1779448	ILMN_1798496	ILMN_1744929	ILMN_1727091	ILMN_1790692	ILMN_3244117	ILMN_1683026	ILMN_1692295
ILMN_1803073	ILMN_2162819	ILMN_1754247	ILMN_2072178	ILMN_1719627	ILMN_3248091	ILMN_1728478	ILMN_2208413
ILMN_1656977	ILMN_1746883	ILMN_1709796	ILMN_2218104	ILMN_1694213	ILMN_1714602	ILMN_1747016	ILMN_2205999
ILMN_1749403	ILMN_1736162	ILMN_2185884	ILMN_1778104	ILMN_1802106	ILMN_1783909	ILMN_1719938	ILMN_2130441
ILMN_1731433	ILMN_1785252	ILMN_2197381	ILMN_1737096	ILMN_1661264	ILMN_1746465	ILMN_1662026	ILMN_1806908
ILMN_1758323	ILMN_2197381	ILMN_2223941	ILMN_1686291	ILMN_1736863	ILMN_3223126	ILMN_2359710	ILMN_1694213
ILMN_2413816	ILMN_1912287	ILMN_1739594	ILMN_1674353	ILMN_1658044	ILMN_1810725	ILMN_1784602	ILMN_1680339
ILMN_3251260	ILMN_1722869	ILMN_1795257	ILMN_1674817	ILMN_1673363	ILMN_2339835	ILMN_3235832	ILMN_1683179
ILMN_2269256	ILMN_1778964	ILMN_1731670	ILMN_1700042	ILMN_1800261	ILMN_1774602	ILMN_3217172	ILMN_1782788
ILMN_2332691	ILMN_1781242	ILMN_1707670	ILMN_1813043	ILMN_3243238	ILMN_1886655	ILMN_1696463	ILMN_1706841
ILMN_1767113	ILMN_2340347	ILMN_1777644	ILMN_1694535	ILMN_1691341	ILMN_1785646	ILMN_1766411	ILMN_1667791
ILMN_2099259	ILMN_1656977	ILMN_2099259	ILMN_3243185	ILMN_1812968	ILMN_1761941	ILMN_1791328	ILMN_1797822
ILMN_2218104	ILMN_1732000	ILMN_1678690	ILMN_1771084	ILMN_1693334	ILMN_1782788	ILMN_1652825	ILMN_1716988
ILMN_1690040	ILMN_1809623	ILMN_2168747	ILMN_1736184	ILMN_1750805	ILMN_1766675	ILMN_1661366	ILMN_1800261
ILMN_1765574	ILMN_2061565	ILMN_1775566	ILMN_1812070	ILMN_2058782	ILMN_1780334	ILMN_1695891	ILMN_1667081
ILMN_1750062	ILMN_1791306	ILMN_1714397	ILMN_1676014	ILMN_1688848	ILMN_1700896	ILMN_1672650	ILMN_1780058
ILMN_1781242	ILMN_1707464	ILMN_1676014	ILMN_2133038	ILMN_1705231	ILMN_2325837	ILMN_1724994	ILMN_1682332
ILMN_2354478	ILMN_1770641	ILMN_2072178	ILMN_2069224	ILMN_1682312	ILMN_3236825	ILMN_1706434	ILMN_1690963
ILMN_2188722	ILMN_1723123	ILMN_1761275	ILMN_2187746	ILMN_1800787	ILMN_1780898	ILMN_1750101	ILMN_2376455
ILMN_1675756	ILMN_1676014	ILMN_1707464	ILMN_1800130	ILMN_1800276	ILMN_1702363	ILMN_1786176	ILMN_2162860
ILMN_1678403	ILMN_1728570	ILMN_1691572	ILMN_1669114	ILMN_1667081	ILMN_1674250	ILMN_3244117	ILMN_1776516
ILMN_1664738	ILMN_1797391	ILMN_2316918	ILMN_1736527	ILMN_1732296	ILMN_1687538	ILMN_1658494	ILMN_1761199
ILMN_1726666	ILMN_1764309	ILMN_1723443	ILMN_2185884	ILMN_1651285	ILMN_1701875	ILMN_1684887	ILMN_1652185
ILMN_1688886	ILMN_1780057	ILMN_2283325	ILMN_1740233	ILMN_1757552	ILMN_1662799	ILMN_2366634	ILMN_2087656
ILMN_2228180	ILMN_1708580	ILMN_1748970	ILMN_1678690	ILMN_2145116	ILMN_1711157	ILMN_1666733	ILMN_3248773
ILMN_2166457	ILMN_1671482	ILMN_1664565	ILMN_1661994	ILMN_1803423	ILMN_3188984	ILMN_2196078	ILMN_2200917
ILMN_1813561	ILMN_1692464	ILMN_1769556	ILMN_1736162	ILMN_1852151	ILMN_1660691	ILMN_2117508	ILMN_1660793
ILMN_1744929	ILMN_1782412	ILMN_3251540	ILMN_1791306	ILMN_1777998	ILMN_1659913	ILMN_1811468	ILMN_1712475
ILMN_2185884	ILMN_1740938	ILMN_2113490	ILMN_2183687	ILMN_1699214	ILMN_3248324	ILMN_1814074	ILMN_2345898
ILMN_1780057	ILMN_1792182	ILMN_1745817	ILMN_1716815	ILMN_1706643	ILMN_2414027	ILMN_2061043	ILMN_1760509
ILMN_2371911	ILMN_2315789	ILMN_2218104	ILMN_3249032	ILMN_1747305	ILMN_1655549	ILMN_1669409	ILMN_1751444
ILMN_1793954	ILMN_1709237	ILMN_1778964	ILMN_1695157	ILMN_1693552	ILMN_1745075	ILMN_1660923	ILMN_1688780
ILMN_1761010	ILMN_1673450	ILMN_1656560	ILMN_1707592	ILMN_1796316	ILMN_1667081	ILMN_1779252	ILMN_2082273
ILMN_1764309	ILMN_1815480	ILMN_1700042	ILMN_1740949	ILMN_1739161	ILMN_1741148	ILMN_2405521	ILMN_1661755
ILMN_1796461	ILMN_1803073	ILMN_2365176	ILMN_1753101	ILMN_1660923	ILMN_2343278	ILMN_1716461	ILMN_1684887
ILMN_1730454	ILMN_1764175	ILMN_1807339	ILMN_1765310	ILMN_2098616	ILMN_1726589	ILMN_1748283	ILMN_1774087
ILMN_1671482	ILMN_1812031	ILMN_2413816	ILMN_1912287	ILMN_1720048	ILMN_1728478	ILMN_2347592	ILMN_2370336
ILMN_1813270	ILMN_2354478	ILMN_1699258	ILMN_1801833	ILMN_1727043	ILMN_1727043	ILMN_1695851	ILMN_1701114
ILMN_1681116	ILMN_1681116	ILMN_1740234	ILMN_2148469	ILMN_1800512	ILMN_2058782	ILMN_2218277	ILMN_1751228
ILMN_1655613	ILMN_3251260	ILMN_1731433	ILMN_1739813	ILMN_1724658	ILMN_1730710	ILMN_1803945	ILMN_2376108
ILMN_2415329	ILMN_2269256	ILMN_1696318	ILMN_2390853	ILMN_2086105	ILMN_2379644	ILMN_1666594	ILMN_2145116
ILMN_1763092	ILMN_1715463	ILMN_1717888	ILMN_1743078	ILMN_1812477	ILMN_2127298	ILMN_1813314	ILMN_1786176
ILMN_1791826	ILMN_2357334	ILMN_1786720	ILMN_1681103	ILMN_1723962	ILMN_1716687	ILMN_1651554	ILMN_1734543
ILMN_1732000	ILMN_1771084	ILMN_1758323	ILMN_2053679	ILMN_1729905	ILMN_1808590	ILMN_2055156	ILMN_1741165
ILMN_1723418	ILMN_1748538	ILMN_1769032	ILMN_2064150	ILMN_2044453	ILMN_1732799	ILMN_1769520	ILMN_1691508
ILMN_1712918	ILMN_1767446	ILMN_2185427	ILMN_1707670	ILMN_2352303	ILMN_1678842	ILMN_3238196	ILMN_3230435
ILMN_2198239	ILMN_1734929	ILMN_1789653	ILMN_1739594	ILMN_1683026	ILMN_1768284	ILMN_1689353	ILMN_1729188
ILMN_1765912	ILMN_1750062	ILMN_1801833	ILMN_1677384	ILMN_1686097	ILMN_1742866	ILMN_1690105	ILMN_1741404
ILMN_1676014	ILMN_1757747	ILMN_3243185	ILMN_1767474	ILMN_2329429	ILMN_1815634	ILMN_2049766	ILMN_1699208
ILMN_1683194	ILMN_1740430	ILMN_1795976	ILMN_2407346	ILMN_3210741	ILMN_2208903	ILMN_1701875	ILMN_1676629
ILMN_1709237	ILMN_1791222	ILMN_1781013	ILMN_2393296	ILMN_1808117	ILMN_1758128	ILMN_1779258	ILMN_1661366
ILMN_1836218	ILMN_2168747	ILMN_1761260	ILMN_1692464	ILMN_2101885	ILMN_1779258	ILMN_1806040	ILMN_1807423
ILMN_1791222	ILMN_1761450	ILMN_1687306	ILMN_2198239	ILMN_1756937	ILMN_1717261	ILMN_1741165	ILMN_1729212
ILMN_1785252	ILMN_1726666	ILMN_1701497	ILMN_1767711	ILMN_2061043	ILMN_1696187	ILMN_2125747	ILMN_1764850
ILMN_1663640	ILMN_1763092	ILMN_2151281	ILMN_1731670	ILMN_2360730	ILMN_1784661	ILMN_2044453	ILMN_1784863
ILMN_1673450	ILMN_1773073	ILMN_2136089	ILMN_1795976	ILMN_2390919	ILMN_1684349	ILMN_2329927	ILMN_2112256
ILMN_1728570	ILMN_2311020	ILMN_1676822	ILMN_2167808	ILMN_1662799	ILMN_1705442	ILMN_1750805	ILMN_1731233
ILMN_1701831	ILMN_1661733	ILMN_3285762	ILMN_2136089	ILMN_1652825	ILMN_1810844	ILMN_2409167	ILMN_2367020
ILMN_1782937	ILMN_1740960	ILMN_1665775	ILMN_1754491	ILMN_1668063	ILMN_1800512	ILMN_1663390	ILMN_1654109
ILMN_1722869	ILMN_1712918	ILMN_1727091	ILMN_2289593	ILMN_2341229	ILMN_1808777	ILMN_2054019	ILMN_1674706
ILMN_1798496	ILMN_1800008	ILMN_1812031	ILMN_1728570	ILMN_1652199	ILMN_1706434	ILMN_3228688	ILMN_1706015
ILMN_1676449	ILMN_1752935	ILMN_2352131	ILMN_1684585	ILMN_1700183	ILMN_1744963	ILMN_1717261	ILMN_1719303
ILMN_1761450	ILMN_1791826	ILMN_1776857	ILMN_1764309	ILMN_1654072	ILMN_1714820	ILMN_3200384	ILMN_1711994
ILMN_2344079	ILMN_2413816	ILMN_1773073	ILMN_2061565	ILMN_1695763	ILMN_1797822	ILMN_1758146	ILMN_1699489
ILMN_1708580	ILMN_1843198	ILMN_2183687	ILMN_1690040	ILMN_2343278	ILMN_1676924	ILMN_2049021	ILMN_1698367
ILMN_1700042	ILMN_2391231	ILMN_1748352	ILMN_1806310	ILMN_1797776	ILMN_3239629	ILMN_1736700	ILMN_1809590
ILMN_1757477	ILMN_1700042	ILMN_1719616	ILMN_2113490	ILMN_1665877	ILMN_1805175	ILMN_1660691	ILMN_2109489
ILMN_1707592	ILMN_1704022	ILMN_1748983	ILMN_1742272	ILMN_3235853	ILMN_3210741	ILMN_2383611	ILMN_1676893
ILMN_1752935	ILMN_2413015	ILMN_1791306	ILMN_3247438	ILMN_1660200	ILMN_1796734	ILMN_2170949	ILMN_1788203
ILMN_1692464	ILMN_1761312	ILMN_1715463	ILMN_2104295	ILMN_1803429	ILMN_2413779	ILMN_1788955	ILMN_1669881
ILMN_1699258	ILMN_1746618	ILMN_2415189	ILMN_1796461	ILMN_1815057	ILMN_2370976	ILMN_1753196	ILMN_2194577
ILMN_1755203	ILMN_1765574	ILMN_1760649	ILMN_1725471	ILMN_1769911	ILMN_2360710	ILMN_1664303	ILMN_1682929
ILMN_1756992	ILMN_2198239	ILMN_2052373	ILMN_1761275	ILMN_1815634	ILMN_1777190	ILMN_1797822	ILMN_1732923
ILMN_1741597	ILMN_1812070	ILMN_1688886	ILMN_1672443	ILMN_1667966	ILMN_2364521	ILMN_1811767	ILMN_1810910
ILMN_2393296	ILMN_1770653	ILMN_1718483	ILMN_2222880	ILMN_1677827	ILMN_1740015	ILMN_2371280	ILMN_1814998
ILMN_1773073	ILMN_2406557	ILMN_1746618	ILMN_2354478	ILMN_1739508	ILMN_2334296	ILMN_1703178	ILMN_2232478
ILMN_1719250	ILMN_1676449	ILMN_1737152	ILMN_1696657	ILMN_1784884	ILMN_2407389	ILMN_1690939	ILMN_2382990
ILMN_2407564	ILMN_1765912	ILMN_1791826	ILMN_1761260	ILMN_1742981	ILMN_1771385	ILMN_1681644	ILMN_1676765
ILMN_1757747	ILMN_1729734	ILMN_1740949	ILMN_1814215	ILMN_1728512	ILMN_1764788	ILMN_2066066	ILMN_2212909
ILMN_2391231	ILMN_1795257	ILMN_2133038	ILMN_1775566	ILMN_2336781	ILMN_2261416	ILMN_1803423	ILMN_1710906
ILMN_1691264	ILMN_2059886	ILMN_1684922	ILMN_1681938	ILMN_2169801	ILMN_1764729	ILMN_1792506	ILMN_1746836
ILMN_1809623	ILMN_2393296	ILMN_1746883	ILMN_1688886	ILMN_3235832	ILMN_1814194	ILMN_2090105	ILMN_2049766
ILMN_2315789	ILMN_1761260	ILMN_2354478	ILMN_1731783	ILMN_1782788	ILMN_1706505	ILMN_3217815	ILMN_1702301
ILMN_1718483	ILMN_1811933	ILMN_2413015	ILMN_1712999	ILMN_2232177	ILMN_2112256	ILMN_1802192	ILMN_1676361
ILMN_1800008	ILMN_1674193	ILMN_2304404	ILMN_1671482	ILMN_1695851	ILMN_1699931	ILMN_1800512	ILMN_2364521
ILMN_1746618	ILMN_1810233	ILMN_1674817	ILMN_1769032	ILMN_2368530	ILMN_1758418	ILMN_1742450	ILMN_1672611
ILMN_1717888	ILMN_1718483	ILMN_1674193	ILMN_1761450	ILMN_2125747	ILMN_1673899	ILMN_1782560	ILMN_2218277
ILMN_1730977	ILMN_2213297	ILMN_1704154	ILMN_2415329	ILMN_1691364	ILMN_1738552	ILMN_1676924	ILMN_1668052
ILMN_2070521	ILMN_1717888	ILMN_2051972	ILMN_1760649	ILMN_2066858	ILMN_2148913	ILMN_3294335	ILMN_1718552
ILMN_1750800	ILMN_2133038	ILMN_2334193	ILMN_1701497	ILMN_1806403	ILMN_1737918	ILMN_1796216	ILMN_1751330
ILMN_1718972	ILMN_2183687	ILMN_2061565	ILMN_1677885	ILMN_1801205	ILMN_2368530	ILMN_1702301	ILMN_2371280
ILMN_3251497	ILMN_1683194	ILMN_1761450	ILMN_1793859	ILMN_2414027	ILMN_1765258	ILMN_2205999	ILMN_1691341
ILMN_1674193	ILMN_1804090	ILMN_1694106	ILMN_1748538	ILMN_1767448	ILMN_1769245	ILMN_1802780	ILMN_1703538
ILMN_1748970	ILMN_2311873	ILMN_2049184	ILMN_2282352	ILMN_2347592	ILMN_1720461	ILMN_1741148	ILMN_2139970
ILMN_2133038	ILMN_1731433	ILMN_1796461	ILMN_1672057	ILMN_1718936	ILMN_2091310	ILMN_2330307	ILMN_1739792
ILMN_1713807	ILMN_1750800	ILMN_1671489	ILMN_2059886	ILMN_1796712	ILMN_1695025	ILMN_3286809	ILMN_3203444
ILMN_2365176	ILMN_1695157	ILMN_2070102	ILMN_2223941	ILMN_1751228	ILMN_3245630	ILMN_1673363	ILMN_1734476
ILMN_2413015	ILMN_1769032	ILMN_1771084	ILMN_1778964	ILMN_1726589	ILMN_2326509	ILMN_1673899	ILMN_1762861
ILMN_1729734	ILMN_1815308	ILMN_1764309	ILMN_2334193	ILMN_1805842	ILMN_1814074	ILMN_2377669	ILMN_1658847
ILMN_1767446	ILMN_2151281	ILMN_1673450	ILMN_2166457	ILMN_1796537	ILMN_3243644	ILMN_1677085	ILMN_1676515
ILMN_1677885	ILMN_1677384	ILMN_1743445	ILMN_1740960	ILMN_1736567	ILMN_3205656	ILMN_1737184	ILMN_1701731
ILMN_1672443	ILMN_1740234	ILMN_1751586	ILMN_1683263	ILMN_1758146	ILMN_2326512	ILMN_1800276	ILMN_1726589
ILMN_1736162	ILMN_2390853	ILMN_2160209	ILMN_1770653	ILMN_1744487	ILMN_1784602	ILMN_1733270	ILMN_2331232
ILMN_1725471	ILMN_1813270	ILMN_2053679	ILMN_1656560	ILMN_1702301	ILMN_1852151	ILMN_1667966	ILMN_1741727
ILMN_1671191	ILMN_1678403	ILMN_1806667	ILMN_1671489	ILMN_1742866	ILMN_2377669	ILMN_1758315	ILMN_2408851
ILMN_3235803	ILMN_1689176	ILMN_2166457	ILMN_1746883	ILMN_1663916	ILMN_1742167	ILMN_1798706	ILMN_1750805
ILMN_1714384	ILMN_1778924	ILMN_1677200	ILMN_1660199	ILMN_1719433	ILMN_1810852	ILMN_1674228	ILMN_1779258
ILMN_2160209	ILMN_1761010	ILMN_1717853	ILMN_1761131	ILMN_1747195	ILMN_1674063	ILMN_2411282	ILMN_1802252
ILMN_1761275	ILMN_1677885	ILMN_1681116	ILMN_1683923	ILMN_1676893	ILMN_1689353	ILMN_2405684	ILMN_1784602
ILMN_1762666	ILMN_1762666	ILMN_1700268	ILMN_1812031	ILMN_3223126	ILMN_1713749	ILMN_1814230	ILMN_2353633
ILMN_1782412	ILMN_1725471	ILMN_1685540	ILMN_1731433	ILMN_1766411	ILMN_2363658	ILMN_1782419	ILMN_1803213
ILMN_2223941	ILMN_1761275	ILMN_1797391	ILMN_1799015	ILMN_1715169	ILMN_2201678	ILMN_3269537	ILMN_3245057
ILMN_1696657	ILMN_1677200	ILMN_2222880	ILMN_1711888	ILMN_1726720	ILMN_1766955	ILMN_1772612	ILMN_1667966
ILMN_1684401	ILMN_1778687	ILMN_1778104	ILMN_1777031	ILMN_1652631	ILMN_1801710	ILMN_1666078	ILMN_1815895
ILMN_1800898	ILMN_1664738	ILMN_1692464	ILMN_1777644	ILMN_1806165	ILMN_1780799	ILMN_1719303	ILMN_1814230
ILMN_1804090	ILMN_2070521	ILMN_1762666	ILMN_1673450	ILMN_1711408	ILMN_1739161	ILMN_1774836	ILMN_1653856
ILMN_1797391	ILMN_1729281	ILMN_1726666	ILMN_2336595	ILMN_2413808	ILMN_1751904	ILMN_1733259	ILMN_1796216
ILMN_1791306	ILMN_1734559	ILMN_1770641	ILMN_1677200	ILMN_1716608	ILMN_2396444	ILMN_1718936	ILMN_1659905
ILMN_2213297	ILMN_1780255	ILMN_2198239	ILMN_2352131	ILMN_1689353	ILMN_2390299	ILMN_1678454	ILMN_2046730
ILMN_3307693	ILMN_3251540	ILMN_1701507	ILMN_1664565	ILMN_3245057	ILMN_1695311	ILMN_1659960	ILMN_1704730
ILMN_1815319	ILMN_1807981	ILMN_1787265	ILMN_1749403	ILMN_1702691	ILMN_1712389	ILMN_1667825	ILMN_1733176
ILMN_1802131	ILMN_1718972	ILMN_1662731	ILMN_1719250	ILMN_2096719	ILMN_1698766	ILMN_2067656	ILMN_1652825
ILMN_1717853	ILMN_1696657	ILMN_1747577	ILMN_1737152	ILMN_2120273	ILMN_1724533	ILMN_1708375	ILMN_1711617
ILMN_1821517	ILMN_1714397	ILMN_1664464	ILMN_1762666	ILMN_1756417	ILMN_1767006	ILMN_1652631	ILMN_2370976
ILMN_2285375	ILMN_1719250	ILMN_1740960	ILMN_1730977	ILMN_1749070	ILMN_1791280	ILMN_1713505	ILMN_1801710
ILMN_1740430	ILMN_1680652	ILMN_1651568	ILMN_2094875	ILMN_3188984	ILMN_1781155	ILMN_1727087	ILMN_1673363
ILMN_1734897	ILMN_1806787	ILMN_2188722	ILMN_1684922	ILMN_2373062	ILMN_1689578	ILMN_1775327	ILMN_1697543
ILMN_1774742	ILMN_2396903	ILMN_1766712	ILMN_1740426	ILMN_3293685	ILMN_2289849	ILMN_1751228	ILMN_1781400
ILMN_1761260	ILMN_2070102	ILMN_1843198	ILMN_1737588	ILMN_1733538	ILMN_1691717	ILMN_1785646	ILMN_3294222
ILMN_1815480	ILMN_1751586	ILMN_1668507	ILMN_1806667	ILMN_1798706	ILMN_1711408	ILMN_1695311	ILMN_1761463
ILMN_2205767	ILMN_1735386	ILMN_1793954	ILMN_2406557	ILMN_2114568	ILMN_1794707	ILMN_1764709	ILMN_2232854
ILMN_1718023	ILMN_1687721	ILMN_1749868	ILMN_1664464	ILMN_1763433	ILMN_2329927	ILMN_1667371	ILMN_1714433
ILMN_2150894	ILMN_1742534	ILMN_1670325	ILMN_2070102	ILMN_1732923	ILMN_1765701	ILMN_1704730	ILMN_1894911
ILMN_1778964	ILMN_1714384	ILMN_1803367	ILMN_1764175	ILMN_1812902	ILMN_1795089	ILMN_1667430	ILMN_2170209
ILMN_1740938	ILMN_1802131	ILMN_1792182	ILMN_1706690	ILMN_1697561	ILMN_2087646	ILMN_1662843	ILMN_2373062
ILMN_1761312	ILMN_2415583	ILMN_1807981	ILMN_1764607	ILMN_1700896	ILMN_2373791	ILMN_2383349	ILMN_3244457
ILMN_1740233	ILMN_1691175	ILMN_1810275	ILMN_2151281	ILMN_1800697	ILMN_2314169	ILMN_2232177	ILMN_2074477
ILMN_1807633	ILMN_2150894	ILMN_2070521	ILMN_1709634	ILMN_1806040	ILMN_1693334	ILMN_1773262	ILMN_2186137
ILMN_1714397	ILMN_1794213	ILMN_1678403	ILMN_1687721	ILMN_1701875	ILMN_1667825	ILMN_1689518	ILMN_1716957
ILMN_1723123	ILMN_2285375	ILMN_2289593	ILMN_1763558	ILMN_1758128	ILMN_1799725	ILMN_1809928	ILMN_1703178
ILMN_1666967	ILMN_3235803	ILMN_1784287	ILMN_1730454	ILMN_2079655	ILMN_1796216	ILMN_2364521	ILMN_2380237
ILMN_1772731	ILMN_2344079	ILMN_2059886	ILMN_2313821	ILMN_2165753	ILMN_1714433	ILMN_2254635	ILMN_1764109
ILMN_1680652	ILMN_1811632	ILMN_1656910	ILMN_2225537	ILMN_1734543	ILMN_2148785	ILMN_3283772	ILMN_1700896
ILMN_1768227	ILMN_2365176	ILMN_1752935	ILMN_1697460	ILMN_3239181	ILMN_2282641	ILMN_1700896	ILMN_1791328
ILMN_1665775	ILMN_2332691	ILMN_1780255	ILMN_1713807	ILMN_2063168	ILMN_1748473	ILMN_1653871	ILMN_3217172
ILMN_1656638	ILMN_2205767	ILMN_1747546	ILMN_1810275	ILMN_1706505	ILMN_2325763	ILMN_2230025	ILMN_3304898
ILMN_1814719	ILMN_1653358	ILMN_2105960	ILMN_2372698	ILMN_2390299	ILMN_1661266	ILMN_3278506	ILMN_2390919
ILMN_1728132	ILMN_1741597	ILMN_1799015	ILMN_1715463	ILMN_1796629	ILMN_1806040	ILMN_2157441	ILMN_1716909
ILMN_1705172	ILMN_2188722	ILMN_1681938	ILMN_1680874	ILMN_2363658	ILMN_2222234	ILMN_1663916	ILMN_1668411
ILMN_2070102	ILMN_1796461	ILMN_1734897	ILMN_2185427	ILMN_1712389	ILMN_1763452	ILMN_1710740	ILMN_2415235
ILMN_1743784	ILMN_1756992	ILMN_1781242	ILMN_1821517	ILMN_1741404	ILMN_1752520	ILMN_1667224	ILMN_2355831
ILMN_1677200	ILMN_1672536	ILMN_1807633	ILMN_1806787	ILMN_2222234	ILMN_1769911	ILMN_1752046	ILMN_1651554
ILMN_1681754	ILMN_1747577	ILMN_1651819	ILMN_1758323	ILMN_2208903	ILMN_2165753	ILMN_1747195	ILMN_1796245
ILMN_1700831	ILMN_1752451	ILMN_1712999	ILMN_2340347	ILMN_1801616	ILMN_1676528	ILMN_1810725	ILMN_1796712
ILMN_1717248	ILMN_2223941	ILMN_1770653	ILMN_2413816	ILMN_2368318	ILMN_3211132	ILMN_1761425	ILMN_1678454
ILMN_1691175	ILMN_1772809	ILMN_1782412	ILMN_1696318	ILMN_2261600	ILMN_1812392	ILMN_2366330	ILMN_1745963
ILMN_1740234	ILMN_2237428	ILMN_2094875	ILMN_1712918	ILMN_1814074	ILMN_1787461	ILMN_1695763	ILMN_1716246
ILMN_1782938	ILMN_2407564	ILMN_1670193	ILMN_1743445	ILMN_1678842	ILMN_1701877	ILMN_1703538	ILMN_1655987
ILMN_1766079	ILMN_1730977	ILMN_1671482	ILMN_2415189	ILMN_1699574	ILMN_1801205	ILMN_1693014	ILMN_2083066
ILMN_1824490	ILMN_1768227	ILMN_2314417	ILMN_2315789	ILMN_1768284	ILMN_2110908	ILMN_1812392	ILMN_2206722
ILMN_1740949	ILMN_1715452	ILMN_1712719	ILMN_1687235	ILMN_1769520	ILMN_1807825	ILMN_3249748	ILMN_1677827
ILMN_1730917	ILMN_2415329	ILMN_1806710	ILMN_2099259	ILMN_1668092	ILMN_1741404	ILMN_1677827	ILMN_3217815
ILMN_1729374	ILMN_1681754	ILMN_2391231	ILMN_1747577	ILMN_1767006	ILMN_1720235	ILMN_1693334	ILMN_1652082
ILMN_1812096	ILMN_2160209	ILMN_1740418	ILMN_1651819	ILMN_1687538	ILMN_1658044	ILMN_2392043	ILMN_1691892
ILMN_1795872	ILMN_1740949	ILMN_2357334	ILMN_2412849	ILMN_1747744	ILMN_1718833	ILMN_2232478	ILMN_3283772
ILMN_2384536	ILMN_1735192	ILMN_1683102	ILMN_1751586	ILMN_2393450	ILMN_1803945	ILMN_1769779	ILMN_1790761
ILMN_2237428	ILMN_1688162	ILMN_1794825	ILMN_1712719	ILMN_1744968	ILMN_2336781	ILMN_1766169	ILMN_1696463
ILMN_1742534	ILMN_1694106	ILMN_1815319	ILMN_1714197	ILMN_1761464	ILMN_2083946	ILMN_1767006	ILMN_1662026
ILMN_1807652	ILMN_2338038	ILMN_2407564	ILMN_2401641	ILMN_1764577	ILMN_1766925	ILMN_1807106	ILMN_1688959
ILMN_2059886	ILMN_1748970	ILMN_1714197	ILMN_1761312	ILMN_3239629	ILMN_1660654	ILMN_3188984	ILMN_1703692
ILMN_1816342	ILMN_1793954	ILMN_1653358	ILMN_1794825	ILMN_1713749	ILMN_2383611	ILMN_1812433	ILMN_1768425
ILMN_1775448	ILMN_1774742	ILMN_2336595	ILMN_1688228	ILMN_1791280	ILMN_1789648	ILMN_1787345	ILMN_2254635
ILMN_1777031	ILMN_2219767	ILMN_2219767	ILMN_2234697	ILMN_3241262	ILMN_1758281	ILMN_1777190	ILMN_1751726
ILMN_1734559	ILMN_2094416	ILMN_2082865	ILMN_1662731	ILMN_1808777	ILMN_2169966	ILMN_1691364	ILMN_2365307
ILMN_1681938	ILMN_1742330	ILMN_1719581	ILMN_1781013	ILMN_1704554	ILMN_1742981	ILMN_1688480	ILMN_1782419
ILMN_1789653	ILMN_1678690	ILMN_1672057	ILMN_1662154	ILMN_1660691	ILMN_1810420	ILMN_1655077	ILMN_1662843
ILMN_1713846	ILMN_1690040	ILMN_1741597	ILMN_1780831	ILMN_1796179	ILMN_1760027	ILMN_1763000	ILMN_1732538
ILMN_2372698	ILMN_1671191	ILMN_1691175	ILMN_1656910	ILMN_2082209	ILMN_1711899	ILMN_1666269	ILMN_3286809
ILMN_2406557	ILMN_2371911	ILMN_1778687	ILMN_2205767	ILMN_2184184	ILMN_2261600	ILMN_2359907	ILMN_1739496
ILMN_1726456	ILMN_2189371	ILMN_1737096	ILMN_1740418	ILMN_1810420	ILMN_1751228	ILMN_1743797	ILMN_1656670
ILMN_1670385	ILMN_2226324	ILMN_2406557	ILMN_2181892	ILMN_2054019	ILMN_2157441	ILMN_1784884	ILMN_1660654
ILMN_2304404	ILMN_1815319	ILMN_1743784	ILMN_1783497	ILMN_1705442	ILMN_1795762	ILMN_3297126	ILMN_2349071
ILMN_1811632	ILMN_1737588	ILMN_1748538	ILMN_2216815	ILMN_2393765	ILMN_1723912	ILMN_1786065	ILMN_1660027
ILMN_1750674	ILMN_1672443	ILMN_2340347	ILMN_1704531	ILMN_1697268	ILMN_1666078	ILMN_2353633	ILMN_1660021
ILMN_2197381	ILMN_2387214	ILMN_1712918	ILMN_1750800	ILMN_1810725	ILMN_2067656	ILMN_1674063	ILMN_1780334
ILMN_1812070	ILMN_1755649	ILMN_1677885	ILMN_1743784	ILMN_2115005	ILMN_1782419	ILMN_2348788	ILMN_3200384
ILMN_1715463	ILMN_1810684	ILMN_1723418	ILMN_1780057	ILMN_2083946	ILMN_1671106	ILMN_1678143	ILMN_1801939
ILMN_1762718	ILMN_1712314	ILMN_2387214	ILMN_1813685	ILMN_3211132	ILMN_3249748	ILMN_1795089	ILMN_1796537
ILMN_1743078	ILMN_2053679	ILMN_1718852	ILMN_1791222	ILMN_1784320	ILMN_1710734	ILMN_1714730	ILMN_1701877
ILMN_1660729	ILMN_1807633	ILMN_1735192	ILMN_1797391	ILMN_1732799	ILMN_1699071	ILMN_2184184	ILMN_2334296
ILMN_1662640	ILMN_1698179	ILMN_1732000	ILMN_1788078	ILMN_1765258	ILMN_1660923	ILMN_1651826	ILMN_1761903
ILMN_1733627	ILMN_1795872	ILMN_3251497	ILMN_1708328	ILMN_2264011	ILMN_1747744	ILMN_1780533	ILMN_1767665
ILMN_2189371	ILMN_1750097	ILMN_1657087	ILMN_1681116	ILMN_1808590	ILMN_1770922	ILMN_1728934	ILMN_2253732
ILMN_1747577	ILMN_2336595	ILMN_1733333	ILMN_1807339	ILMN_1742544	ILMN_1779252	ILMN_1722898	ILMN_1772612
ILMN_1807981	ILMN_1774901	ILMN_3251260	ILMN_2049184	ILMN_1774602	ILMN_1709683	ILMN_1801377	ILMN_1782560
ILMN_1694106	ILMN_1662731	ILMN_1662154	ILMN_1674193	ILMN_1711617	ILMN_1732967	ILMN_1674036	ILMN_2148785
ILMN_2336595	ILMN_1713807	ILMN_1740917	ILMN_2383229	ILMN_1711157	ILMN_1731374	ILMN_1802252	ILMN_1706434
ILMN_1678619	ILMN_1765966	ILMN_1750800	ILMN_3251346	ILMN_1754798	ILMN_1670926	ILMN_1763433	ILMN_1801377
ILMN_2226324	ILMN_2222880	ILMN_2226324	ILMN_2206009	ILMN_2127298	ILMN_1676256	ILMN_2267914	ILMN_3294335
ILMN_2282352	ILMN_2316918	ILMN_1707592	ILMN_1719581	ILMN_2392261	ILMN_1656310	ILMN_1685625	ILMN_1674063
ILMN_1763558	ILMN_1803367	ILMN_1733627	ILMN_1757747	ILMN_1738552	ILMN_1658847	ILMN_2390299	ILMN_1663390
ILMN_1796377	ILMN_1699258	ILMN_1740076	ILMN_1691175	ILMN_1780898	ILMN_1768482	ILMN_3241234	ILMN_1787844
ILMN_2316918	ILMN_1676822	ILMN_1664176	ILMN_2313672	ILMN_1728478	ILMN_1752046	ILMN_1801504	ILMN_3245458
ILMN_1811933	ILMN_1678619	ILMN_2401641	ILMN_1803745	ILMN_1776678	ILMN_1772612	ILMN_2370976	ILMN_2230025
ILMN_1698179	ILMN_1766712	ILMN_1782937	ILMN_2413015	ILMN_1716276	ILMN_1765446	ILMN_1790778	ILMN_2267914
ILMN_1794643	ILMN_2153916	ILMN_1738401	ILMN_2150894	ILMN_1676528	ILMN_1808707	ILMN_3243644	ILMN_1672650
ILMN_2113470	ILMN_1813741	ILMN_2205767	ILMN_2231911	ILMN_1796734	ILMN_1744381	ILMN_1656310	ILMN_2193233
ILMN_3251346	ILMN_1718852	ILMN_1742330	ILMN_1793954	ILMN_1660364	ILMN_2066066	ILMN_1688848	ILMN_1774836
ILMN_1791679	ILMN_1670385	ILMN_1687971	ILMN_2246661	ILMN_1717261	ILMN_2184184	ILMN_2373062	ILMN_1788955
ILMN_1729281	ILMN_2086470	ILMN_3235803	ILMN_1744929	ILMN_1761941	ILMN_1813206	ILMN_1676528	ILMN_1766539
ILMN_1748538	ILMN_1824490	ILMN_2390853	ILMN_1752451	ILMN_1734276	ILMN_1693452	ILMN_2105441	ILMN_1689518
ILMN_1752451	ILMN_1748983	ILMN_1761131	ILMN_2407564	ILMN_1750974	ILMN_1739170	ILMN_1751028	ILMN_2087646
ILMN_1681103	ILMN_1714197	ILMN_1688089	ILMN_1688089	ILMN_2325763	ILMN_1798975	ILMN_2334296	ILMN_1764788
ILMN_1813043	ILMN_1724437	ILMN_1761312	ILMN_2384536	ILMN_1844464	ILMN_1678841	ILMN_1701114	ILMN_2115005
ILMN_2371001	ILMN_1772910	ILMN_1780057	ILMN_1748352	ILMN_1886655	ILMN_1807106	ILMN_1784661	ILMN_3238196
ILMN_1714197	ILMN_1821517	ILMN_1716815	ILMN_1782389	ILMN_1714433	ILMN_3228688	ILMN_1773125	ILMN_3248910
ILMN_1737588	ILMN_1665775	ILMN_1785252	ILMN_1687971	ILMN_1796216	ILMN_2221808	ILMN_1656670	ILMN_1676899
ILMN_1764266	ILMN_1701603	ILMN_1729734	ILMN_2399919	ILMN_1744381	ILMN_1655077	ILMN_1679262	ILMN_2092118
ILMN_2061565	ILMN_1666967	ILMN_1806787	ILMN_2357334	ILMN_1760062	ILMN_1760347	ILMN_1768483	ILMN_1752046
ILMN_2355486	ILMN_1752199	ILMN_1806310	ILMN_1781242	ILMN_1656670	ILMN_1724994	ILMN_1701877	ILMN_1701875
ILMN_2396903	ILMN_1813561	ILMN_2231911	ILMN_1779241	ILMN_1758418	ILMN_1653466	ILMN_1726720	ILMN_2218208
ILMN_2387214	ILMN_1761131	ILMN_2094416	ILMN_1798496	ILMN_2208413	ILMN_1761733	ILMN_2374340	ILMN_1728478
ILMN_2415583	ILMN_1777031	ILMN_1812096	ILMN_2406634	ILMN_1780533	ILMN_1691860	ILMN_1761464	ILMN_1716461
ILMN_1778104	ILMN_1788416	ILMN_1711888	ILMN_1719616	ILMN_1769245	ILMN_1807042	ILMN_1764788	ILMN_2370208
ILMN_2225537	ILMN_1740426	ILMN_2210934	ILMN_1670193	ILMN_1698766	ILMN_1796179	ILMN_2092118	ILMN_1669409
ILMN_1779241	ILMN_1772731	ILMN_2120695	ILMN_1746618	ILMN_2325837	ILMN_1773125	ILMN_2058782	ILMN_2412192
ILMN_1657435	ILMN_1708341	ILMN_1670385	ILMN_1668507	ILMN_1708375	ILMN_2353732	ILMN_1796537	ILMN_1769779
ILMN_1786720	ILMN_1707592	ILMN_3307693	ILMN_1764494	ILMN_1805192	ILMN_1677814	ILMN_1697543	ILMN_2125747
ILMN_1704022	ILMN_1674160	ILMN_2242900	ILMN_1725675	ILMN_2413779	ILMN_2392261	ILMN_1767665	ILMN_1668039
ILMN_1815556	ILMN_1801443	ILMN_1721495	ILMN_1843198	ILMN_1703852	ILMN_1714861	ILMN_2206722	ILMN_1651826
ILMN_1704531	ILMN_3251497	ILMN_1740430	ILMN_2219767	ILMN_1724533	ILMN_1793476	ILMN_1791280	ILMN_2055156
ILMN_1780255	ILMN_2181892	ILMN_2285375	ILMN_1704537	ILMN_1674250	ILMN_1788955	ILMN_1696187	ILMN_2063168
ILMN_1755649	ILMN_1807652	ILMN_2150894	ILMN_1683670	ILMN_1784602	ILMN_2088437	ILMN_1798975	ILMN_1781155
ILMN_1742330	ILMN_1779241	ILMN_1772809	ILMN_1727815	ILMN_2326512	ILMN_3293685	ILMN_2326509	ILMN_1781626
ILMN_1799535	ILMN_2346339	ILMN_3308961	ILMN_1663640	ILMN_1781155	ILMN_1761464	ILMN_1752520	ILMN_1778401
ILMN_1653358	ILMN_3248511	ILMN_3304200	ILMN_3235803	ILMN_1777190	ILMN_2376859	ILMN_1768940	ILMN_1800512
ILMN_1695157	ILMN_1812096	ILMN_2412849	ILMN_1766712	ILMN_2308849	ILMN_2376108	ILMN_1787461	ILMN_2105573
ILMN_1778357	ILMN_1718023	ILMN_1704537	ILMN_2358760	ILMN_1658926	ILMN_1710937	ILMN_1661266	ILMN_1665583
ILMN_1751586	ILMN_1814719	ILMN_1666967	ILMN_1749868	ILMN_1765446	ILMN_1794782	ILMN_1730710	ILMN_1677085
ILMN_1778924	ILMN_1717853	ILMN_1766499	ILMN_1784287	ILMN_1764729	ILMN_2140059	ILMN_3239629	ILMN_1723962
ILMN_1813741	ILMN_1739813	ILMN_3236950	ILMN_1766079	ILMN_1751851	ILMN_1718063	ILMN_2140059	ILMN_1763000
ILMN_1843198	ILMN_1791728	ILMN_1755649	ILMN_2237428	ILMN_1701514	ILMN_2146761	ILMN_1705442	ILMN_1747016
ILMN_3248882	ILMN_1681103	ILMN_1777031	ILMN_1740170	ILMN_3249748	ILMN_2085862	ILMN_1801710	ILMN_2067656
ILMN_2406299	ILMN_1728132	ILMN_1811632	ILMN_1694106	ILMN_1802441	ILMN_1666932	ILMN_2326512	ILMN_1663916
ILMN_1687721	ILMN_1789653	ILMN_1715452	ILMN_3236950	ILMN_1723684	ILMN_1805842	ILMN_1769911	ILMN_1906187
ILMN_1753502	ILMN_1763011	ILMN_1734559	ILMN_1702858	ILMN_3244117	ILMN_1657234	ILMN_1662799	ILMN_2383611
ILMN_3243598	ILMN_2270802	ILMN_1718565	ILMN_1660635	ILMN_2261416	ILMN_1682993	ILMN_1682312	ILMN_3259146
ILMN_1692664	ILMN_1733627	ILMN_1685709	ILMN_2398572	ILMN_1702363	ILMN_1651610	ILMN_1804530	ILMN_1774602
ILMN_1812031	ILMN_2399919	ILMN_2206009	ILMN_3285762	ILMN_1737918	ILMN_2059797	ILMN_2414027	ILMN_1724994
ILMN_1794213	ILMN_1670193	ILMN_1757747	ILMN_1740430	ILMN_2379644	ILMN_3302919	ILMN_1781514	ILMN_1768469
ILMN_1787265	ILMN_2376847	ILMN_2113470	ILMN_1657435	ILMN_1695025	ILMN_1788203	ILMN_1677814	ILMN_1690939
ILMN_2153916	ILMN_1749868	ILMN_1663538	ILMN_1812096	ILMN_1810852	ILMN_1810289	ILMN_1714602	ILMN_1667825
ILMN_1761131	ILMN_1683923	ILMN_2313672	ILMN_2285375	ILMN_1721559	ILMN_1684620	ILMN_1697268	ILMN_1737184
ILMN_1801833	ILMN_2316878	ILMN_1755720	ILMN_1701457	ILMN_1655549	ILMN_1803094	ILMN_2059797	ILMN_2101885
ILMN_1724437	ILMN_2094875	ILMN_2189371	ILMN_1738401	ILMN_2334296	ILMN_1666894	ILMN_2130441	ILMN_1742789
ILMN_2390853	ILMN_1795190	ILMN_1791222	ILMN_2341363	ILMN_1779252	ILMN_1719236	ILMN_1660364	ILMN_1751851
ILMN_1744211	ILMN_1701636	ILMN_2216815	ILMN_3305273	ILMN_1790859	ILMN_1779324	ILMN_2114568	ILMN_1667430
ILMN_1662731	ILMN_1796377	ILMN_1690979	ILMN_1692651	ILMN_1773125	ILMN_1678143	ILMN_1784863	ILMN_1798975
ILMN_2217601	ILMN_1782938	ILMN_2116877	ILMN_1759670	ILMN_1684349	ILMN_3237946	ILMN_1794782	ILMN_1795251
ILMN_2292646	ILMN_1665331	ILMN_1709634	ILMN_1791826	ILMN_2112256	ILMN_1815895	ILMN_1807277	ILMN_1673899
ILMN_2219767	ILMN_1794643	ILMN_1671260	ILMN_2226324	ILMN_1671106	ILMN_1721559	ILMN_1781155	ILMN_1768483
ILMN_1661799	ILMN_1681949	ILMN_1755741	ILMN_1681601	ILMN_1812392	ILMN_3240520	ILMN_1745075	ILMN_1683859
ILMN_1659610	ILMN_2103024	ILMN_1737588	ILMN_2314417	ILMN_3250257	ILMN_1672124	ILMN_2148785	ILMN_1787461
ILMN_1665831	ILMN_3248882	ILMN_1767446	ILMN_1664001	ILMN_3236825	ILMN_1704730	ILMN_1699071	ILMN_1798706
ILMN_1652379	ILMN_1750674	ILMN_1655613	ILMN_2051972	ILMN_1684620	ILMN_1679731	ILMN_1702363	ILMN_1667371
ILMN_1708534	ILMN_1762718	ILMN_1710644	ILMN_1815556	ILMN_1656920	ILMN_2169152	ILMN_1709683	ILMN_1751028
ILMN_1769032	ILMN_1707551	ILMN_1763092	ILMN_2371724	ILMN_1724994	ILMN_2329914	ILMN_1783909	ILMN_1764577
ILMN_1790529	ILMN_1786041	ILMN_1687721	ILMN_1763461	ILMN_1758281	ILMN_1686623	ILMN_1684349	ILMN_2392043
ILMN_2234930	ILMN_1657435	ILMN_1738742	ILMN_1806710	ILMN_1782419	ILMN_1727402	ILMN_1844464	ILMN_1693014
ILMN_1683923	ILMN_1755741	ILMN_1756992	ILMN_1726466	ILMN_1723486	ILMN_1775708	ILMN_2363658	ILMN_1758895
ILMN_2094416	ILMN_1705172	ILMN_1765610	ILMN_1724437	ILMN_1720235	ILMN_1654324	ILMN_1679731	ILMN_1796094
ILMN_1706483	ILMN_1793859	ILMN_2393296	ILMN_1685917	ILMN_1659913	ILMN_1688480	ILMN_1699931	ILMN_1750101
ILMN_1746013	ILMN_1727091	ILMN_2199439	ILMN_1782412	ILMN_1751904	ILMN_1773079	ILMN_1744963	ILMN_2061043
ILMN_1663042	ILMN_1806710	ILMN_3305273	ILMN_1747546	ILMN_1714602	ILMN_1729117	ILMN_1693552	ILMN_1666594
ILMN_1793859	ILMN_1787265	ILMN_1683670	ILMN_1792182	ILMN_1780334	ILMN_1785272	ILMN_2085760	ILMN_2366634
ILMN_1715452	ILMN_1657011	ILMN_1812297	ILMN_1663538	ILMN_1797822	ILMN_1687583	ILMN_2413808	ILMN_1802106
ILMN_2337923	ILMN_1740185	ILMN_1749403	ILMN_3240116	ILMN_1766551	ILMN_2309848	ILMN_1733538	ILMN_1695851
ILMN_2313821	ILMN_2304404	ILMN_2399769	ILMN_1653358	ILMN_1739170	ILMN_1765557	ILMN_1764109	ILMN_1744963
ILMN_1813685	ILMN_1831106	ILMN_1748323	ILMN_1740076	ILMN_1766675	ILMN_1723486	ILMN_1712389	ILMN_1676924
ILMN_2379520	ILMN_1791679	ILMN_1799535	ILMN_2199439	ILMN_1696187	ILMN_2203271	ILMN_1667626	ILMN_1654324
ILMN_1685952	ILMN_1799535	ILMN_1665331	ILMN_2211780	ILMN_2122103	ILMN_1704286	ILMN_3178258	ILMN_2409167
ILMN_1705861	ILMN_1778104	ILMN_1787266	ILMN_1656145	ILMN_3302919	ILMN_1682799	ILMN_1802106	ILMN_3297126
ILMN_1761511	ILMN_1813043	ILMN_1821517	ILMN_1677962	ILMN_1666594	ILMN_1762861	ILMN_1750974	ILMN_1764709
ILMN_1739813	ILMN_1725193	ILMN_1725471	ILMN_1772731	ILMN_1801710	ILMN_1773352	ILMN_1806165	ILMN_2352303
ILMN_2388263	ILMN_2049184	ILMN_1793859	ILMN_1706344	ILMN_1674063	ILMN_2143795	ILMN_1716276	ILMN_2326509
ILMN_1786041	ILMN_1653501	ILMN_1671191	ILMN_1715543	ILMN_1679731	ILMN_1792679	ILMN_1769245	ILMN_1777190
ILMN_1740717	ILMN_1688089	ILMN_1701831	ILMN_1765610	ILMN_3245630	ILMN_1689655	ILMN_1742167	ILMN_1780533
ILMN_1766712	ILMN_1664071	ILMN_1723211	ILMN_1683102	ILMN_1740015	ILMN_1718866	ILMN_1752592	ILMN_1656310
ILMN_1691503	ILMN_1662640	ILMN_1696657	ILMN_1776857	ILMN_1672124	ILMN_1656670	ILMN_1793476	ILMN_1748283
ILMN_1712314	ILMN_2234930	ILMN_2406634	ILMN_2338038	ILMN_1687583	ILMN_2402392	ILMN_1729188	ILMN_1775327
ILMN_1804593	ILMN_3243598	ILMN_1815154	ILMN_1785095	ILMN_2289849	ILMN_1745356	ILMN_1682799	ILMN_1678049
ILMN_1685540	ILMN_1753502	ILMN_1763011	ILMN_1666967	ILMN_2091310	ILMN_2130441	ILMN_1807825	ILMN_1656920
ILMN_1774604	ILMN_1652379	ILMN_1660199	ILMN_1740185	ILMN_2282641	ILMN_1729905	ILMN_1803686	ILMN_1814074
ILMN_1688089	ILMN_1801833	ILMN_1680652	ILMN_1816342	ILMN_1701877	ILMN_1801377	ILMN_1660654	ILMN_1672589
ILMN_1802699	ILMN_1744211	ILMN_2371911	ILMN_2242900	ILMN_1666078	ILMN_1752932	ILMN_1785699	ILMN_1758164
ILMN_1672536	ILMN_1726466	ILMN_2361603	ILMN_1751346	ILMN_1814194	ILMN_1709795	ILMN_1810560	ILMN_1678143
ILMN_2338038	ILMN_1714990	ILMN_1719209	ILMN_2054607	ILMN_3240520	ILMN_2142185	ILMN_2413779	ILMN_2412214
ILMN_1672057	ILMN_3243185	ILMN_2384536	ILMN_1721770	ILMN_1794782	ILMN_2076463	ILMN_1799139	ILMN_1766411
ILMN_1694780	ILMN_2384536	ILMN_1813043	ILMN_1814719	ILMN_2383611	ILMN_1768940	ILMN_3302919	ILMN_1809928
ILMN_1806710	ILMN_1716733	ILMN_2338038	ILMN_1718852	ILMN_1699931	ILMN_1752592	ILMN_1689655	ILMN_2090105
ILMN_1663538	ILMN_2309245	ILMN_1811221	ILMN_3285785	ILMN_1787461	ILMN_1667626	ILMN_1815895	ILMN_1723480
ILMN_2386205	ILMN_1672057	ILMN_1740728	ILMN_2210934	ILMN_1766925	ILMN_1811468	ILMN_2221808	ILMN_1756937
ILMN_1688162	ILMN_1743784	ILMN_2103024	ILMN_2283325	ILMN_1807106	ILMN_1751079	ILMN_1678939	ILMN_1679185
ILMN_2311873	ILMN_1663640	ILMN_1813270	ILMN_2391231	ILMN_1807825	ILMN_1705750	ILMN_1674250	ILMN_1685625
ILMN_1750312	ILMN_1656560	ILMN_1684158	ILMN_1761010	ILMN_2169966	ILMN_3239965	ILMN_2376108	ILMN_1812392
ILMN_1672504	ILMN_1674817	ILMN_1803745	ILMN_1770641	ILMN_1785646	ILMN_1771599	ILMN_3211132	ILMN_3261938
ILMN_1674160	ILMN_1815556	ILMN_1794213	ILMN_3251260	ILMN_1716246	ILMN_3243156	ILMN_2282641	ILMN_1667224
ILMN_1795257	ILMN_2283325	ILMN_1753913	ILMN_3245829	ILMN_1752520	ILMN_2074477	ILMN_1718063	ILMN_2326512
ILMN_1653501	ILMN_1672504	ILMN_1664798	ILMN_1763092	ILMN_2087646	ILMN_1774077	ILMN_2297765	ILMN_1772218
ILMN_1751232	ILMN_1805665	ILMN_3251346	ILMN_1767446	ILMN_3248091	ILMN_1723978	ILMN_2410924	ILMN_2186806
ILMN_2316878	ILMN_1687501	ILMN_1774901	ILMN_2160209	ILMN_1771599	ILMN_1727087	ILMN_1760027	ILMN_1784884
ILMN_3251155	ILMN_1708328	ILMN_1721770	ILMN_2067408	ILMN_2326509	ILMN_2098126	ILMN_2184373	ILMN_1730710
ILMN_1682812	ILMN_2313821	ILMN_1763558	ILMN_1762606	ILMN_2146761	ILMN_2371458	ILMN_1803429	ILMN_1754798
ILMN_2206009	ILMN_1849399	ILMN_1702858	ILMN_1662795	ILMN_1701114	ILMN_1787815	ILMN_1713749	ILMN_2377669
ILMN_1774901	ILMN_1719581	ILMN_1740185	ILMN_1787378	ILMN_1709683	ILMN_1790778	ILMN_2331231	ILMN_1691717
ILMN_1719286	ILMN_1660729	ILMN_1750097	ILMN_1651705	ILMN_1803945	ILMN_1653292	ILMN_3239475	ILMN_1658499
ILMN_1764607	ILMN_1720113	ILMN_1663640	ILMN_1742330	ILMN_2201678	ILMN_3266606	ILMN_2285996	ILMN_1666733
ILMN_2399919	ILMN_2172174	ILMN_1728132	ILMN_2189371	ILMN_1693452	ILMN_1791759	ILMN_1760347	ILMN_2120273
ILMN_2199439	ILMN_1726456	ILMN_1795872	ILMN_2136971	ILMN_1720461	ILMN_2331087	ILMN_1810844	ILMN_1658407
ILMN_2181892	ILMN_1667018	ILMN_1672443	ILMN_1657679	ILMN_1710937	ILMN_1662932	ILMN_1720373	ILMN_1677198
ILMN_1750097	ILMN_1803745	ILMN_1657011	ILMN_1740234	ILMN_2067656	ILMN_1722622	ILMN_1762861	ILMN_1661266
ILMN_1803745	ILMN_1662154	ILMN_2311873	ILMN_1719661	ILMN_1732967	ILMN_1809813	ILMN_1729905	ILMN_2330307
ILMN_1665331	ILMN_1796801	ILMN_1764175	ILMN_1656285	ILMN_1691717	ILMN_1689518	ILMN_1677198	ILMN_1753196
ILMN_1718852	ILMN_2181064	ILMN_1677962	ILMN_1781045	ILMN_2307903	ILMN_1813925	ILMN_2208903	ILMN_2080080
ILMN_2376847	ILMN_1730740	ILMN_1678353	ILMN_3308961	ILMN_1785272	ILMN_3239475	ILMN_2349393	ILMN_1652631
ILMN_2242900	ILMN_2399300	ILMN_2167808	ILMN_1661875	ILMN_2297765	ILMN_1795251	ILMN_2076463	ILMN_1733259
ILMN_2094875	ILMN_2234697	ILMN_1687508	ILMN_1811632	ILMN_2157441	ILMN_1711566	ILMN_2412214	ILMN_3188984
ILMN_1714383	ILMN_1691503	ILMN_1685917	ILMN_1687508	ILMN_2110908	ILMN_1682775	ILMN_1699651	ILMN_2117508
ILMN_1664001	ILMN_1728047	ILMN_1704022	ILMN_1683470	ILMN_1808707	ILMN_1653028	ILMN_2396444	ILMN_1795089
ILMN_1788122	ILMN_1723211	ILMN_1671568	ILMN_1799535	ILMN_1771385	ILMN_2379599	ILMN_1727043	ILMN_2196078
ILMN_1786381	ILMN_1727098	ILMN_1657679	ILMN_1738742	ILMN_1788203	ILMN_1754894	ILMN_2381945	ILMN_1763433
ILMN_1686562	ILMN_1740717	ILMN_1788078	ILMN_3306730	ILMN_3228688	ILMN_3239060	ILMN_1655549	ILMN_2405521
ILMN_1912287	ILMN_1816342	ILMN_1763461	ILMN_2082865	ILMN_2376108	ILMN_1778401	ILMN_1810289	ILMN_1784320
ILMN_1788416	ILMN_2113470	ILMN_1762718	ILMN_1780255	ILMN_1731374	ILMN_2194577	ILMN_2222234	ILMN_3235832
ILMN_1780861	ILMN_1664001	ILMN_1726466	ILMN_1748899	ILMN_2066066	ILMN_1661599	ILMN_1807042	ILMN_1695891
ILMN_1683133	ILMN_1687508	ILMN_1752451	ILMN_3230880	ILMN_1795089	ILMN_2218208	ILMN_1691717	ILMN_1723522
ILMN_1801348	ILMN_1687213	ILMN_1683923	ILMN_1728132	ILMN_1764788	ILMN_1725090	ILMN_1653028	ILMN_1695763
ILMN_2192072	ILMN_2406299	ILMN_1729281	ILMN_1803676	ILMN_1762861	ILMN_1685714	ILMN_1886655	ILMN_1712431
ILMN_1771800	ILMN_1764494	ILMN_1779241	ILMN_1712419	ILMN_1760027	ILMN_1695880	ILMN_1727194	ILMN_1699852
ILMN_2236440	ILMN_2380771	ILMN_2043079	ILMN_1752935	ILMN_1657234	ILMN_2109708	ILMN_1701195	ILMN_1660364
ILMN_1756701	ILMN_1659610	ILMN_1708328	ILMN_1710644	ILMN_1718063	ILMN_2138765	ILMN_1763452	ILMN_2110908
ILMN_1763461	ILMN_2343264	ILMN_1683470	ILMN_2124361	ILMN_2169152	ILMN_1781514	ILMN_2289849	ILMN_2388070
ILMN_1704537	ILMN_2372698	ILMN_1736162	ILMN_1757210	ILMN_1788955	ILMN_1773262	ILMN_1670926	ILMN_1773125
ILMN_1674522	ILMN_2242900	ILMN_1706483	ILMN_1729374	ILMN_1714861	ILMN_1658494	ILMN_3223126	ILMN_1742167
ILMN_1776263	ILMN_2371001	ILMN_2347145	ILMN_1670385	ILMN_1760347	ILMN_1772359	ILMN_1808707	ILMN_2366330
ILMN_1876924	ILMN_2355486	ILMN_2094061	ILMN_1774901	ILMN_1773079	ILMN_1674376	ILMN_1687583	ILMN_1768940
ILMN_1651819	ILMN_1813685	ILMN_3230880	ILMN_1748970	ILMN_1670926	ILMN_1782538	ILMN_2307861	ILMN_1684349
ILMN_2341363	ILMN_2352131	ILMN_1703174	ILMN_1804150	ILMN_1810289	ILMN_1776181	ILMN_2103107	ILMN_3269537
ILMN_2314417	ILMN_1681938	ILMN_1674908	ILMN_1723418	ILMN_1660654	ILMN_1772218	ILMN_1801766	ILMN_1761733
ILMN_1849399	ILMN_1738401	ILMN_3241729	ILMN_1714990	ILMN_1748473	ILMN_2175912	ILMN_2304512	ILMN_1810844
ILMN_2167808	ILMN_1764090	ILMN_1662795	ILMN_1815308	ILMN_1656310	ILMN_1795442	ILMN_1695025	ILMN_1660691
ILMN_3285785	ILMN_1876924	ILMN_2371001	ILMN_1719209	ILMN_1799725	ILMN_1657111	ILMN_1685714	ILMN_2374340
ILMN_1687501	ILMN_1665856	ILMN_2415329	ILMN_1734559	ILMN_1718866	ILMN_2123743	ILMN_2169152	ILMN_2413808
ILMN_1725193	ILMN_1782937	ILMN_2270802	ILMN_1676449	ILMN_1676256	ILMN_2186806	ILMN_1775708	ILMN_1791726
ILMN_1725675	ILMN_1740233	ILMN_1813561	ILMN_1753340	ILMN_1763452	ILMN_1680618	ILMN_3239060	ILMN_1803423
ILMN_2313672	ILMN_2209238	ILMN_2399463	ILMN_1803367	ILMN_1676924	ILMN_2320888	ILMN_1680618	ILMN_2308849
ILMN_1806787	ILMN_2206009	ILMN_1724437	ILMN_1688162	ILMN_1677814	ILMN_1772876	ILMN_2404688	ILMN_2049021
ILMN_1657862	ILMN_1784287	ILMN_2355486	ILMN_2380588	ILMN_1688480	ILMN_1736670	ILMN_1708934	ILMN_1785646
ILMN_1729439	ILMN_1702858	ILMN_3245829	ILMN_1678403	ILMN_1787815	ILMN_1680996	ILMN_1682993	ILMN_3205656
ILMN_1711124	ILMN_1746013	ILMN_2135258	ILMN_1680652	ILMN_1772612	ILMN_1794370	ILMN_1761733	ILMN_2138765
ILMN_1681949	ILMN_3245829	ILMN_1681754	ILMN_1741597	ILMN_1695311	ILMN_1798360	ILMN_1686623	ILMN_1751079
ILMN_2231911	ILMN_1674135	ILMN_1656369	ILMN_1733627	ILMN_1768482	ILMN_1708934	ILMN_1738552	ILMN_1812433
ILMN_2053679	ILMN_1744949	ILMN_1798992	ILMN_1678710	ILMN_1752046	ILMN_1691884	ILMN_2066858	ILMN_1662799
ILMN_1747546	ILMN_2217601	ILMN_2413158	ILMN_1815319	ILMN_2376859	ILMN_2211065	ILMN_1797875	ILMN_3241234
ILMN_2086470	ILMN_1763558	ILMN_1719351	ILMN_1804090	ILMN_1666932	ILMN_1659027	ILMN_1737918	ILMN_1698766
ILMN_1677384	ILMN_2225537	ILMN_1766918	ILMN_1804711	ILMN_1801377	ILMN_1685433	ILMN_1778401	ILMN_1811468
ILMN_1715543	ILMN_1697820	ILMN_2282352	ILMN_1684158	ILMN_1667825	ILMN_1654396	ILMN_3205656	ILMN_1679731
ILMN_2309245	ILMN_1778357	ILMN_1751439	ILMN_1658619	ILMN_1710734	ILMN_1803882	ILMN_2331087	ILMN_1677636
ILMN_1798249	ILMN_2292646	ILMN_1676449	ILMN_1668408	ILMN_2396444	ILMN_1687301	ILMN_1796179	ILMN_1760347
ILMN_1662795	ILMN_1692664	ILMN_2383229	ILMN_1698179	ILMN_2377669	ILMN_1658835	ILMN_1755974	ILMN_2213136
ILMN_3248511	ILMN_1756701	ILMN_1706690	ILMN_2094416	ILMN_2140059	ILMN_1761425	ILMN_1768425	ILMN_1712389
ILMN_1767337	ILMN_1658706	ILMN_2372698	ILMN_1808487	ILMN_2085862	ILMN_1784863	ILMN_1799725	ILMN_1791576
ILMN_1765966	ILMN_1685441	ILMN_1678619	ILMN_1809483	ILMN_1658847	ILMN_1726809	ILMN_1772876	ILMN_2363658
ILMN_1674135	ILMN_1797557	ILMN_1764494	ILMN_1797557	ILMN_1704730	ILMN_1735220	ILMN_3293685	ILMN_1807277
ILMN_1736154	ILMN_1739429	ILMN_1698179	ILMN_1740728	ILMN_1766955	ILMN_1795325	ILMN_1742981	ILMN_2085760
ILMN_2343264	ILMN_1790529	ILMN_1849399	ILMN_2404407	ILMN_1704286	ILMN_1797731	ILMN_1659913	ILMN_1815500
ILMN_2270802	ILMN_1719661	ILMN_1660729	ILMN_1671191	ILMN_2130441	ILMN_1701308	ILMN_1731374	ILMN_1808777
ILMN_1685403	ILMN_1772894	ILMN_2399919	ILMN_2380771	ILMN_1689655	ILMN_1721035	ILMN_1779017	ILMN_1655549
ILMN_2180885	ILMN_1798841	ILMN_1664001	ILMN_3224926	ILMN_1765557	ILMN_2331082	ILMN_1727402	ILMN_1733538
ILMN_1707551	ILMN_1750312	ILMN_1673113	ILMN_1755741	ILMN_1815895	ILMN_1671565	ILMN_2042771	ILMN_1666269
ILMN_1669781	ILMN_2231911	ILMN_2234697	ILMN_1729281	ILMN_1792679	ILMN_1808405	ILMN_2176063	ILMN_2114568
ILMN_1764494	ILMN_1656910	ILMN_1705172	ILMN_1770940	ILMN_2148785	ILMN_3249667	ILMN_1706505	ILMN_1654411
ILMN_1732782	ILMN_1677962	ILMN_2398572	ILMN_2094061	ILMN_3237946	ILMN_2058251	ILMN_1781626	ILMN_1693334
ILMN_2385566	ILMN_1748323	ILMN_1681601	ILMN_1753502	ILMN_1773352	ILMN_3240308	ILMN_3239965	ILMN_1693552
ILMN_1803367	ILMN_1663538	ILMN_1796801	ILMN_1716237	ILMN_1761733	ILMN_2183409	ILMN_2402392	ILMN_1803788
ILMN_1815154	ILMN_1689431	ILMN_2415583	ILMN_2387214	ILMN_2353732	ILMN_1789007	ILMN_2186806	ILMN_3239965
ILMN_1735192	ILMN_1685952	ILMN_1743078	ILMN_1714643	ILMN_1795762	ILMN_1723522	ILMN_1732967	ILMN_2351466
ILMN_1810684	ILMN_2404407	ILMN_1764090	ILMN_2372398	ILMN_1768940	ILMN_1801077	ILMN_2393765	ILMN_1653579
ILMN_1712684	ILMN_1775163	ILMN_1824490	ILMN_1729734	ILMN_1752592	ILMN_1755974	ILMN_2301083	ILMN_1713749
ILMN_1795906	ILMN_1764266	ILMN_1658619	ILMN_1704022	ILMN_1793476	ILMN_2359800	ILMN_1666932	ILMN_1802780
ILMN_1727098	ILMN_1778173	ILMN_1713807	ILMN_1653278	ILMN_1682799	ILMN_3214389	ILMN_1740015	ILMN_1655077
ILMN_1706579	ILMN_1708534	ILMN_1714990	ILMN_2057220	ILMN_1654324	ILMN_1689329	ILMN_1706643	ILMN_2056032
ILMN_1791728	ILMN_1746819	ILMN_1718023	ILMN_2151739	ILMN_1719236	ILMN_1656011	ILMN_1711899	ILMN_1728934
ILMN_1752199	ILMN_1761511	ILMN_1727815	ILMN_2206272	ILMN_2088437	ILMN_1762260	ILMN_1714861	ILMN_1696187
ILMN_1762606	ILMN_1683102	ILMN_1733811	ILMN_1682812	ILMN_3239475	ILMN_1778977	ILMN_1765701	ILMN_3239060
ILMN_2141118	ILMN_1685540	ILMN_1708534	ILMN_2043079	ILMN_1723978	ILMN_2375879	ILMN_2309848	ILMN_1786065
ILMN_1775163	ILMN_1664798	ILMN_2181892	ILMN_1685709	ILMN_2059797	ILMN_1767556	ILMN_2325837	ILMN_1772876
ILMN_1701636	ILMN_1774604	ILMN_3285785	ILMN_1778687	ILMN_1653466	ILMN_1805737	ILMN_2339835	ILMN_2176063
ILMN_2352131	ILMN_1776263	ILMN_1715324	ILMN_1749410	ILMN_1780799	ILMN_2082273	ILMN_2353732	ILMN_2359907
ILMN_1723211	ILMN_3251346	ILMN_1748899	ILMN_1774742	ILMN_2309848	ILMN_1785902	ILMN_3237946	ILMN_1773262
ILMN_1772910	ILMN_1706579	ILMN_2225537	ILMN_1764090	ILMN_2373791	ILMN_2104356	ILMN_1767556	ILMN_2041101
ILMN_2399300	ILMN_1708798	ILMN_1652379	ILMN_2332691	ILMN_2194577	ILMN_3250067	ILMN_1779324	ILMN_1769911
ILMN_1701507	ILMN_1683133	ILMN_1778173	ILMN_2386205	ILMN_1695880	ILMN_1760247	ILMN_2387385	ILMN_1789507
ILMN_1723414	ILMN_1655613	ILMN_1797557	ILMN_1805916	ILMN_2074477	ILMN_1663866	ILMN_1656487	ILMN_1784661
ILMN_1734929	ILMN_2081087	ILMN_1814719	ILMN_2413158	ILMN_1723912	ILMN_1765796	ILMN_1684620	ILMN_2414027
ILMN_2209238	ILMN_1762606	ILMN_2086470	ILMN_1766499	ILMN_1678143	ILMN_1801584	ILMN_1704286	ILMN_1733270
ILMN_1655614	ILMN_1774091	ILMN_1787673	ILMN_1686562	ILMN_2076463	ILMN_1760849	ILMN_1768482	ILMN_1810289
ILMN_1751425	ILMN_3307693	ILMN_1712088	ILMN_1815154	ILMN_1807042	ILMN_1796094	ILMN_1772218	ILMN_1674250
ILMN_1664071	ILMN_2199439	ILMN_1712314	ILMN_1798249	ILMN_3240308	ILMN_1815205	ILMN_3181328	ILMN_2222234
ILMN_2222880	ILMN_1729439	ILMN_1801476	ILMN_1718972	ILMN_1729117	ILMN_1651554	ILMN_1674376	ILMN_3302919
ILMN_1680251	ILMN_1800898	ILMN_2344079	ILMN_1665033	ILMN_2203271	ILMN_1673521	ILMN_2138765	ILMN_1783909
ILMN_1702858	ILMN_2414268	ILMN_1753502	ILMN_1780170	ILMN_1779324	ILMN_1713182	ILMN_1678842	ILMN_1769245
ILMN_1670193	ILMN_1660732	ILMN_1692651	ILMN_1745817	ILMN_1722622	ILMN_2105797	ILMN_1803882	ILMN_1806165
ILMN_1657011	ILMN_2052373	ILMN_1756701	ILMN_1664176	ILMN_1674376	ILMN_2149226	ILMN_1710734	ILMN_2325837
ILMN_3236481	ILMN_1807211	ILMN_2371724	ILMN_1671568	ILMN_2143795	ILMN_1796409	ILMN_2261416	ILMN_1727194
ILMN_1724207	ILMN_2206272	ILMN_1716733	ILMN_1757387	ILMN_1680996	ILMN_1666665	ILMN_1736670	ILMN_1750974
ILMN_1740185	ILMN_2403237	ILMN_1831106	ILMN_3235606	ILMN_2221808	ILMN_1749131	ILMN_2085862	ILMN_2309156
ILMN_2043079	ILMN_2228780	ILMN_1796377	ILMN_1772809	ILMN_1682993	ILMN_1774207	ILMN_1813925	ILMN_1699931
ILMN_1738849	ILMN_1721770	ILMN_1687235	ILMN_1807981	ILMN_1661266	ILMN_2386444	ILMN_1710937	ILMN_1805175
ILMN_2409754	ILMN_1766079	ILMN_1772731	ILMN_1775441	ILMN_2371458	ILMN_1758731	ILMN_1795325	ILMN_1781514
ILMN_1658619	ILMN_1705627	ILMN_1751425	ILMN_3241729	ILMN_3243156	ILMN_2212878	ILMN_1794370	ILMN_1716276
ILMN_1786105	ILMN_2386205	ILMN_3301749	ILMN_1801476	ILMN_1736670	ILMN_1785732	ILMN_1741404	ILMN_1684620
ILMN_2052373	ILMN_1664176	ILMN_1770940	ILMN_1652379	ILMN_1666894	ILMN_1745299	ILMN_1796094	ILMN_1653028
ILMN_1678690	ILMN_2313672	ILMN_2313821	ILMN_2361603	ILMN_1691860	ILMN_2364022	ILMN_1782538	ILMN_1844464
ILMN_1727778	ILMN_2167808	ILMN_1659610	ILMN_2311873	ILMN_3266606	ILMN_1746085	ILMN_2406501	ILMN_1682312
ILMN_1656145	ILMN_1719351	ILMN_1772910	ILMN_1755352	ILMN_1705750	ILMN_2396875	ILMN_1698766	ILMN_1763452
ILMN_1733869	ILMN_1771800	ILMN_1810915	ILMN_1778173	ILMN_1811468	ILMN_1685608	ILMN_1785272	ILMN_3178258
ILMN_1728047	ILMN_1734897	ILMN_2332691	ILMN_1707710	ILMN_1651610	ILMN_1715508	ILMN_1658835	ILMN_1714602
ILMN_1805665	ILMN_2061435	ILMN_2386982	ILMN_3243593	ILMN_1762260	ILMN_1752755	ILMN_2105797	ILMN_1726720
ILMN_1708341	ILMN_1763461	ILMN_1688162	ILMN_2371001	ILMN_2402392	ILMN_1659990	ILMN_1758418	ILMN_2169152
ILMN_1696450	ILMN_1657679	ILMN_1732782	ILMN_1668312	ILMN_1655077	ILMN_1725139	ILMN_1809813	ILMN_1689353
ILMN_1662154	ILMN_2300970	ILMN_1686562	ILMN_1718565	ILMN_1711566	ILMN_1697189	ILMN_3240375	ILMN_1793476
ILMN_2372398	ILMN_1688228	ILMN_2234930	ILMN_3187771	ILMN_1803094	ILMN_1707727	ILMN_1765668	ILMN_2411282
ILMN_1785570	ILMN_1709634	ILMN_1664071	ILMN_1681634	ILMN_2331087	ILMN_1756573	ILMN_2331082	ILMN_1745075
ILMN_1784783	ILMN_1706483	ILMN_1769433	ILMN_1703174	ILMN_1752932		ILMN_1765446	ILMN_1810172
ILMN_1746819	ILMN_1706690	ILMN_1707551	ILMN_1712088	ILMN_3239965		ILMN_1773352	ILMN_1686623
ILMN_2317658	ILMN_1727778	ILMN_1737089	ILMN_1788239	ILMN_1789648		ILMN_1792679	ILMN_1738552
ILMN_3245829	ILMN_1681601	ILMN_2041190	ILMN_1808238	ILMN_1735220		ILMN_1735220	ILMN_2285996
ILMN_1774062	ILMN_1815154	ILMN_1656145	ILMN_1737089	ILMN_1653292		ILMN_1804601	ILMN_1697268
ILMN_1760199	ILMN_1802699	ILMN_1783497	ILMN_1678619	ILMN_1745356		ILMN_1773079	ILMN_1714730
ILMN_1744949	ILMN_2399463	ILMN_1661875	ILMN_2269256	ILMN_2379599		ILMN_1686097	ILMN_2261416
ILMN_1656560	ILMN_1723414	ILMN_1815308	ILMN_3306482	ILMN_1725090		ILMN_1751079	ILMN_1803686
ILMN_2228780	ILMN_1699829	ILMN_1871361	ILMN_1685663	ILMN_1778401		ILMN_1795442	ILMN_2289849
ILMN_1683470	ILMN_1780861	ILMN_1788416	ILMN_2385566	ILMN_1772359		ILMN_1715068	ILMN_3244117
ILMN_2143685	ILMN_1712684	ILMN_1761010	ILMN_1697820	ILMN_1751079		ILMN_1795762	ILMN_3223126
ILMN_1651705	ILMN_3251155	ILMN_1745887	ILMN_1715452	ILMN_1727402		ILMN_2371458	ILMN_1758731
ILMN_1701749	ILMN_1798546	ILMN_1718972	ILMN_1813270	ILMN_1661599		ILMN_1774077	ILMN_1804530
ILMN_3244114	ILMN_1716815	ILMN_1711124	ILMN_1699695	ILMN_1689518		ILMN_2203271	ILMN_1886655
ILMN_1692651	ILMN_1705861	ILMN_1775441	ILMN_1679725	ILMN_1667626		ILMN_3210741	ILMN_1729905
ILMN_1723436	ILMN_1743445	ILMN_2392189	ILMN_1685540	ILMN_1776181		ILMN_1709795	ILMN_1807825
ILMN_1719351	ILMN_1713846	ILMN_1697820	ILMN_2367172	ILMN_1726809		ILMN_1739508	ILMN_2297765
ILMN_1689176	ILMN_1686562	ILMN_1809291	ILMN_2056606	ILMN_1709795		ILMN_1693452	ILMN_1736670
ILMN_1726466	ILMN_1680251	ILMN_1687768	ILMN_1723211	ILMN_2329914		ILMN_1699214	ILMN_1688848
ILMN_1807211	ILMN_1657862	ILMN_1681634	ILMN_1664369	ILMN_1686623		ILMN_1729117	ILMN_1718063
ILMN_2046611	ILMN_1751232	ILMN_1813685	ILMN_1676822	ILMN_1813925		ILMN_2314169	ILMN_1735220
ILMN_1715476	ILMN_1724832	ILMN_1707710	ILMN_1655545	ILMN_1774077		ILMN_1705750	ILMN_1797875
ILMN_2403237	ILMN_1769433	ILMN_1712419	ILMN_2230566	ILMN_1687301		ILMN_1678841	ILMN_3239629
ILMN_2183687	ILMN_1656369	ILMN_1725193	ILMN_1745849	ILMN_1678841		ILMN_1661599	ILMN_1705442
ILMN_1740426	ILMN_1732782	ILMN_3239861	ILMN_3289297	ILMN_1781514		ILMN_1745356	ILMN_1674376
ILMN_1664176	ILMN_1785570	ILMN_1665033	ILMN_1763011	ILMN_1658494		ILMN_1765557	ILMN_1688480
ILMN_1794132	ILMN_1767337	ILMN_2386205	ILMN_1776263	ILMN_1782538		ILMN_1662932	ILMN_1799725
ILMN_2322996	ILMN_1791447	ILMN_2413833	ILMN_1733811	ILMN_1755974		ILMN_1801077	ILMN_2396444
ILMN_1685441	ILMN_1680032	ILMN_1744211	ILMN_1685952	ILMN_1795442		ILMN_2336781	ILMN_2282641
ILMN_1779882	ILMN_2236440	ILMN_1656285	ILMN_1796801	ILMN_2142185		ILMN_1685433	ILMN_1807042
ILMN_1694535	ILMN_1736154	ILMN_3246037	ILMN_1794213	ILMN_1795251		ILMN_2407389	ILMN_1760027
ILMN_2052871	ILMN_2072178	ILMN_1789502	ILMN_2310814	ILMN_1775708		ILMN_2261600	ILMN_1677814
ILMN_1668408	ILMN_1694535	ILMN_1765574	ILMN_1664798	ILMN_1708934		ILMN_2148913	ILMN_2208903
ILMN_2172174	ILMN_3285785	ILMN_1753340	ILMN_1656913	ILMN_2186806		ILMN_1711566	ILMN_1714861
ILMN_2225595	ILMN_1689699	ILMN_3251155	ILMN_1758034	ILMN_1658835		ILMN_2212878	ILMN_2076463
ILMN_1687235	ILMN_1692651	ILMN_1712231	ILMN_1798992	ILMN_1772218		ILMN_1754894	ILMN_1702363
ILMN_1710644	ILMN_1860638	ILMN_1768719	ILMN_1803073	ILMN_3239060		ILMN_2058251	ILMN_2065773
ILMN_2254962	ILMN_1740728	ILMN_2206272	ILMN_1871361	ILMN_2138765		ILMN_2375879	ILMN_2331087
ILMN_2091347	ILMN_1701831	ILMN_2066151	ILMN_2052208	ILMN_1790778		ILMN_2098126	ILMN_1682993
ILMN_1697820	ILMN_1765610	ILMN_2083789	ILMN_1728047	ILMN_2098126		ILMN_1680996	ILMN_1785699
ILMN_1730740	ILMN_1760199	ILMN_2404407	ILMN_2300970	ILMN_1653028		ILMN_2175912	ILMN_1782538
ILMN_1665856	ILMN_2341363	ILMN_1781045	ILMN_1788416	ILMN_1809813		ILMN_2392261	ILMN_1808707
ILMN_1860638	ILMN_1729374	ILMN_1744293	ILMN_1750312	ILMN_1701308		ILMN_2143795	ILMN_2083946
ILMN_1796165	ILMN_1786720	ILMN_1716237	ILMN_1681754	ILMN_1794370		ILMN_1680274	ILMN_2331231
ILMN_1742444	ILMN_1718565	ILMN_1674135	ILMN_1718023	ILMN_1657111		ILMN_1687301	ILMN_1761425
ILMN_1708328	ILMN_1676393	ILMN_1798841	ILMN_1707551	ILMN_1727087		ILMN_1653292	ILMN_2201678
ILMN_2183692	ILMN_1703174	ILMN_2380771	ILMN_3246037	ILMN_1773262		ILMN_1747744	ILMN_1682799
ILMN_2135321	ILMN_1725675	ILMN_2163723	ILMN_1824490	ILMN_1754894		ILMN_2211065	ILMN_3237946
ILMN_1765610	ILMN_1788122	ILMN_1683133	ILMN_2390609	ILMN_1685714		ILMN_1654396	ILMN_1695025
ILMN_1806434	ILMN_1682812	ILMN_2107991	ILMN_2225595	ILMN_1662932		ILMN_1797731	ILMN_2392261
ILMN_1716733	ILMN_1704531	ILMN_1736154	ILMN_1769433	ILMN_2359800		ILMN_2315044	ILMN_1710734
ILMN_1740920	ILMN_1753913	ILMN_1670807	ILMN_1710495	ILMN_1680618		ILMN_2109708	ILMN_1727402
ILMN_1664798	ILMN_2409754	ILMN_1704531	ILMN_1756469	ILMN_2218208		ILMN_1801205	ILMN_1765701
ILMN_2406410	ILMN_1751425	ILMN_2225595	ILMN_1657011	ILMN_1713182		ILMN_1796316	ILMN_2371458
ILMN_1732066	ILMN_1796165	ILMN_1778924	ILMN_1658806	ILMN_1789007		ILMN_1691884	ILMN_1801077
ILMN_1719581	ILMN_1745570	ILMN_1791728	ILMN_1728467	ILMN_1682775		ILMN_1657234	ILMN_2184184
ILMN_2048607	ILMN_2314417	ILMN_1816342	ILMN_1654861	ILMN_2123743		ILMN_1805737	ILMN_3211132
ILMN_2300970	ILMN_1798992	ILMN_1688228	ILMN_1716733	ILMN_1798360		ILMN_1798360	ILMN_1715068
ILMN_1687508	ILMN_1711124	ILMN_1727098	ILMN_2344079	ILMN_1772876		ILMN_3249667	ILMN_1737918
ILMN_2230016	ILMN_1683313	ILMN_1786041	ILMN_1849399	ILMN_1659027		ILMN_1726809	ILMN_1685714
ILMN_1831106	ILMN_2406656	ILMN_1750689	ILMN_2105960	ILMN_1784863		ILMN_1758731	ILMN_1766169
ILMN_1749405	ILMN_1662795	ILMN_2180885	ILMN_1751439	ILMN_2331082		ILMN_1723486	ILMN_1687583
ILMN_1712088	ILMN_2122420	ILMN_1705861	ILMN_1736154	ILMN_1791759		ILMN_2320888	ILMN_1801504
ILMN_1677962	ILMN_1721495	ILMN_1815556	ILMN_1708534	ILMN_1795325		ILMN_1721035	ILMN_1709683
ILMN_1780170	ILMN_2254962	ILMN_1776263	ILMN_2107991	ILMN_1671565		ILMN_3243156	ILMN_1774077
ILMN_2380771	ILMN_3239861	ILMN_1706344	ILMN_1687824	ILMN_2320888		ILMN_3250067	ILMN_1768482
ILMN_1705464	ILMN_1745849	ILMN_1726456	ILMN_2189859	ILMN_2109708		ILMN_1652199	ILMN_1737683
ILMN_1687213	ILMN_1658071	ILMN_1804711	ILMN_1721495	ILMN_3249667		ILMN_3214389	ILMN_1723706
ILMN_2406656	ILMN_1655545	ILMN_1715543	ILMN_1735192	ILMN_1691884		ILMN_1721559	ILMN_1743797
ILMN_2296843	ILMN_2401641	ILMN_2153916	ILMN_1722073	ILMN_1721035		ILMN_1791759	ILMN_1742981
ILMN_1799015	ILMN_1799015	ILMN_2341363	ILMN_1720838	ILMN_2058251		ILMN_1722622	ILMN_2353732
ILMN_1720113	ILMN_1764607	ILMN_2405254	ILMN_1742444	ILMN_2183409		ILMN_1815205	ILMN_3278506
ILMN_2404407	ILMN_1730917	ILMN_2309245	ILMN_2066151	ILMN_1797731		ILMN_1770922	ILMN_1711899
ILMN_3306482	ILMN_2047511	ILMN_1674160	ILMN_1813964	ILMN_1808405		ILMN_2379599	ILMN_2105797
ILMN_1705627	ILMN_1723436	ILMN_1653501	ILMN_1787265	ILMN_2175912		ILMN_1723978	ILMN_3239475
ILMN_1724832	ILMN_1764061	ILMN_2310814	ILMN_1701386	ILMN_2104356		ILMN_1771599	ILMN_1758418
ILMN_1712430	ILMN_1662161	ILMN_3277332	ILMN_1660727	ILMN_2211065		ILMN_1666665	ILMN_2059797
ILMN_1738058	ILMN_1803673	ILMN_3235606	ILMN_1733333	ILMN_1685433		ILMN_1724533	ILMN_2085862
ILMN_1657679	ILMN_2105960	ILMN_1813964	ILMN_1815392	ILMN_1778977		ILMN_2359800	ILMN_1659913
ILMN_1745849	ILMN_1652846	ILMN_1664861	ILMN_1796074	ILMN_1801077		ILMN_1808405	ILMN_1667626
ILMN_2073604	ILMN_2183692	ILMN_2414268	ILMN_1653501	ILMN_1761425		ILMN_1785732	ILMN_1755974
ILMN_1716237	ILMN_1794825	ILMN_2230566	ILMN_1804673	ILMN_3214389		ILMN_1772359	ILMN_1765668
ILMN_1664369	ILMN_2386982	ILMN_1728047	ILMN_1683133	ILMN_1805737		ILMN_2146761	ILMN_1727043
ILMN_1788078	ILMN_1745887	ILMN_1803073	ILMN_2135321	ILMN_1673521		ILMN_1744381	ILMN_1666932
ILMN_1764061	ILMN_2282352	ILMN_1664369	ILMN_1750689	ILMN_1654396		ILMN_2183409	ILMN_1710937
ILMN_1658706	ILMN_1669781	ILMN_3235718	ILMN_1699357	ILMN_1689329		ILMN_1778977	ILMN_1730777
ILMN_1714990	ILMN_3244114	ILMN_3306482	ILMN_2368585	ILMN_1785902		ILMN_1813206	ILMN_2066858
ILMN_1738401	ILMN_1806667	ILMN_2141118	ILMN_1678579	ILMN_3250067		ILMN_1718866	ILMN_2140059
ILMN_3259884	ILMN_2380938	ILMN_1751576	ILMN_2113535	ILMN_1765796		ILMN_2123743	ILMN_1801766
ILMN_1719661	ILMN_2296843	ILMN_2217601	ILMN_1658706	ILMN_1815205		ILMN_1673521	ILMN_1791759
ILMN_1676822	ILMN_1719209	ILMN_2061435	ILMN_1672389	ILMN_1760247		ILMN_1785902	ILMN_1727087
ILMN_1808487	ILMN_2210934	ILMN_1755352	ILMN_1768719	ILMN_1803882		ILMN_1657111	ILMN_1658835
ILMN_1683313	ILMN_1651819	ILMN_1703648	ILMN_1745887	ILMN_1663866		ILMN_1774207	ILMN_1779324
ILMN_1658071	ILMN_1665831	ILMN_1730740	ILMN_1681670	ILMN_1801584		ILMN_3240308	ILMN_1740015
ILMN_1742859	ILMN_1742859	ILMN_2236440	ILMN_1665331	ILMN_1723522		ILMN_1671565	ILMN_1708934
ILMN_1685043	ILMN_1660749	ILMN_2388263	ILMN_2122420	ILMN_1767556		ILMN_1749131	ILMN_2103107
ILMN_1654861	ILMN_2349982	ILMN_2343264	ILMN_1694840	ILMN_1760849		ILMN_1776181	ILMN_1734276
ILMN_1703648	ILMN_1728467	ILMN_2172174	ILMN_1724504	ILMN_2386444		ILMN_1752755	ILMN_2221808
ILMN_2163723	ILMN_1683470	ILMN_1714643	ILMN_1732000	ILMN_1666665		ILMN_1801584	ILMN_1745356
ILMN_1718565	ILMN_1738058	ILMN_2269256	ILMN_1785252	ILMN_1796094		ILMN_1659027	ILMN_1752520
ILMN_1804150	ILMN_1742444	ILMN_1771652	ILMN_2083789	ILMN_2149226		ILMN_2386444	ILMN_1680618
ILMN_1722073	ILMN_1804593	ILMN_2406299	ILMN_1760199	ILMN_1651554		ILMN_1760849	ILMN_1721559
ILMN_1798546	ILMN_1775448	ILMN_1804090	ILMN_2403896	ILMN_1774207		ILMN_2149226	ILMN_2383349
ILMN_1714335	ILMN_1784783	ILMN_2372082	ILMN_1680032	ILMN_1656011		ILMN_1701308	ILMN_3293685
ILMN_2289593	ILMN_1808272	ILMN_1788239	ILMN_2415583	ILMN_2375879		ILMN_1796409	ILMN_2042771
ILMN_1761566	ILMN_1738742	ILMN_2054607	ILMN_1659610	ILMN_2082273		ILMN_1745299	ILMN_1686097
ILMN_1803219	ILMN_1703648	ILMN_1785095	ILMN_1724207	ILMN_1749131		ILMN_2104356	ILMN_1657234
ILMN_2376553	ILMN_1710644	ILMN_1729374	ILMN_1788122	ILMN_2212878		ILMN_1725090	ILMN_3210741
ILMN_1701386	ILMN_3306482	ILMN_1774742	ILMN_1785113	ILMN_1796409		ILMN_3266606	ILMN_2307861
ILMN_1676393	ILMN_1740169	ILMN_2211780	ILMN_1761566	ILMN_1758731		ILMN_1656011	ILMN_1726809
ILMN_1783681	ILMN_1779882	ILMN_1804593	ILMN_1763852	ILMN_2364022		ILMN_1760247	ILMN_1732967
ILMN_1689699	ILMN_2043079	ILMN_1780831	ILMN_1692824	ILMN_1785732		ILMN_1762260	ILMN_1803882
ILMN_2098743	ILMN_3187771	ILMN_1699695	ILMN_1806434	ILMN_1746085		ILMN_1695880	ILMN_2348788
ILMN_2319952	ILMN_1758404	ILMN_1807652	ILMN_1689046	ILMN_2396875		ILMN_1787815	ILMN_3214389
ILMN_1780831	ILMN_1786105	ILMN_1796165	ILMN_1723414	ILMN_1715508		ILMN_1765796	ILMN_1662932
ILMN_1774387	ILMN_2225595	ILMN_2094952	ILMN_1740717	ILMN_2105797		ILMN_1713182	ILMN_2261600
ILMN_2047511	ILMN_2379520	ILMN_1745079	ILMN_1787843	ILMN_1745299		ILMN_1689329	ILMN_2203271
ILMN_1660732	ILMN_2322996	ILMN_2081087	ILMN_1791838	ILMN_1659990		ILMN_1663866	ILMN_2331082
ILMN_1781536	ILMN_1812297	ILMN_1651705	ILMN_1717357	ILMN_1697189		ILMN_1746085	ILMN_1796316
ILMN_2103024	ILMN_2399769	ILMN_1806434	ILMN_1744293	ILMN_1685608		ILMN_2364022	ILMN_1795762
ILMN_1797557	ILMN_1850238	ILMN_1668312	ILMN_1671260	ILMN_1752755		ILMN_2396875	ILMN_2301083
ILMN_1772369	ILMN_2046611	ILMN_1708798	ILMN_2383455	ILMN_1725139		ILMN_1789007	ILMN_2410924
ILMN_3277332	ILMN_1806434	ILMN_3224926	ILMN_1792741	ILMN_1756573		ILMN_1659990	ILMN_1794370
ILMN_1705922	ILMN_2078599	ILMN_1750312	ILMN_1687303	ILMN_1707727		ILMN_1715508	ILMN_2387385
ILMN_1806667	ILMN_1738849	ILMN_2406656	ILMN_2184556			ILMN_1725139	ILMN_2175912
ILMN_1804562	ILMN_1747546	ILMN_1742534	ILMN_1764321			ILMN_1685608	ILMN_1693452
ILMN_1761322	ILMN_1766918	ILMN_1658806	ILMN_1715324			ILMN_1697189	ILMN_2058251
ILMN_2283325	ILMN_1801348	ILMN_2046611	ILMN_1784783			ILMN_1707727	ILMN_1776181
ILMN_1751258	ILMN_1794132	ILMN_1682812	ILMN_1657087			ILMN_1756573	ILMN_1799139
ILMN_1688775	ILMN_3243593	ILMN_1724832	ILMN_1748281				ILMN_2339835
ILMN_1712786	ILMN_2388263	ILMN_1658706	ILMN_1705861				ILMN_1709795
ILMN_1749868	ILMN_3235718	ILMN_1669523	ILMN_1740938				ILMN_1706643
ILMN_1783497	ILMN_2068747	ILMN_1724207	ILMN_1786041				ILMN_2184373
ILMN_2319292	ILMN_1743078	ILMN_1808238	ILMN_1656369				ILMN_2212878
ILMN_1654441	ILMN_1709399	ILMN_2358760	ILMN_2116877				ILMN_1679262
ILMN_1770719	ILMN_1664369	ILMN_1785113	ILMN_1750158				ILMN_1803429
ILMN_1652846	ILMN_1773228	ILMN_2113535	ILMN_1660890				ILMN_2347592
ILMN_2358760	ILMN_1739274	ILMN_1745849	ILMN_1799128				ILMN_1773352
ILMN_2227533	ILMN_2406410	ILMN_1685952	ILMN_3301749				ILMN_1808405
ILMN_1740169	ILMN_2372398	ILMN_1770245	ILMN_3235718				ILMN_1705750
ILMN_1798841	ILMN_1674908	ILMN_1762606	ILMN_1678678				ILMN_1666665
ILMN_1776857	ILMN_2180885	ILMN_1748281	ILMN_1775814				ILMN_1704286
ILMN_1699829	ILMN_1740920	ILMN_3306730	ILMN_1662640				ILMN_1654396
ILMN_2403730	ILMN_2380588	ILMN_1655545	ILMN_1796377				ILMN_1724533
ILMN_1815392	ILMN_1751941	ILMN_2385566	ILMN_1789502				ILMN_1767556
ILMN_2414268	ILMN_1776857	ILMN_1726980	ILMN_1750097				ILMN_1798360
ILMN_1751941	ILMN_1803194	ILMN_3223826	ILMN_2234930				ILMN_2309848
ILMN_1757370		ILMN_1658071	ILMN_1708798				ILMN_2143795
ILMN_1728467		ILMN_1804798	ILMN_2311020				ILMN_1792679
ILMN_1690616		ILMN_1669781	ILMN_2399769				ILMN_3249667
ILMN_1755352		ILMN_1807211	ILMN_1701918				ILMN_1678842
ILMN_2401641		ILMN_1724504	ILMN_2142117				ILMN_1731374
ILMN_2373728		ILMN_1725675	ILMN_1740005				ILMN_1721035
ILMN_1735156		ILMN_3235709	ILMN_1718136				ILMN_1754894
ILMN_1730777		ILMN_1798249	ILMN_1810915				ILMN_2109708
ILMN_1706386		ILMN_1812721	ILMN_2379520				ILMN_2402392
ILMN_1774091		ILMN_1685978	ILMN_1669781				ILMN_1773079
ILMN_1744293		ILMN_2380588	ILMN_1740265				ILMN_2098126
ILMN_1815719		ILMN_1742444	ILMN_1772910				ILMN_1701195
ILMN_1705066		ILMN_3240116	ILMN_1726456				ILMN_2105441
ILMN_1764090		ILMN_2135321	ILMN_1712231				ILMN_1795442
ILMN_1809437		ILMN_2246661	ILMN_2382505				ILMN_1795325
ILMN_1850238		ILMN_1709399	ILMN_2352097				ILMN_1813925
ILMN_1760174		ILMN_1739274	ILMN_1796165				ILMN_2407389
ILMN_1727091		ILMN_1840316	ILMN_2128428				ILMN_1670926
ILMN_3235606		ILMN_1761322	ILMN_2376553				ILMN_1722898
ILMN_1763011		ILMN_1717294	ILMN_1658917				ILMN_1760247
ILMN_1794825		ILMN_1723414	ILMN_1740920				ILMN_2314169
ILMN_1796801		ILMN_1719661	ILMN_1732782				ILMN_2381945
ILMN_1655545		ILMN_1752199	ILMN_2217601				ILMN_1762260
ILMN_1803673		ILMN_3245062	ILMN_1696675				ILMN_2359800
ILMN_1756784		ILMN_1786381	ILMN_2355486				ILMN_1775708
ILMN_1770245		ILMN_2311020	ILMN_1694780				ILMN_3243156
ILMN_1745570		ILMN_1658917	ILMN_2220518				ILMN_1729117
ILMN_2094856		ILMN_2183692	ILMN_1751576				ILMN_2375879
ILMN_1727195		ILMN_1662161	ILMN_1787673				ILMN_2146761
ILMN_1743911		ILMN_1780132	ILMN_1677043				ILMN_1797731
ILMN_1696432		ILMN_1681949	ILMN_1662438				ILMN_1723486
ILMN_1809483		ILMN_1722073	ILMN_3277332				ILMN_2320888
ILMN_2072622		ILMN_1727479	ILMN_2135258				ILMN_3240308
ILMN_2082865		ILMN_2383455	ILMN_2142353				ILMN_1785272
ILMN_1662161		ILMN_1785570	ILMN_1704154				ILMN_1661599
ILMN_1766918		ILMN_1678700	ILMN_1753249				ILMN_1653292
ILMN_1693311		ILMN_1784783	ILMN_1664330				ILMN_1720373
ILMN_1755741		ILMN_2122420	ILMN_2172174				ILMN_1765446
ILMN_1697267		ILMN_3275575	ILMN_1678353				ILMN_2123743
ILMN_1708130		ILMN_3248882	ILMN_1703648				ILMN_1785732
ILMN_1721623		ILMN_1764321	ILMN_1711124				ILMN_2211065
ILMN_1730809		ILMN_1727778	ILMN_1756685				ILMN_3250067
ILMN_1703174		ILMN_2228780	ILMN_1692861				ILMN_1765557
ILMN_1701025		ILMN_2316878	ILMN_1661799				ILMN_1749131
ILMN_1653940		ILMN_1665856	ILMN_1753913				ILMN_1801205
ILMN_1799889		ILMN_1778337	ILMN_3302625				ILMN_1657111
ILMN_1721495		ILMN_1794643	ILMN_2236440				ILMN_1699651
ILMN_1753345		ILMN_1723042	ILMN_1701749				ILMN_1779017
ILMN_2363744		ILMN_1656537	ILMN_1771652				ILMN_1771599
ILMN_1749834		ILMN_1653200	ILMN_3307693				ILMN_1680996
ILMN_1708798		ILMN_2209238	ILMN_1717294				ILMN_1778977
ILMN_1802174		ILMN_1724666	ILMN_1727778				ILMN_1711566
ILMN_1674817		ILMN_1766079	ILMN_1777499				ILMN_1801584
ILMN_2109197		ILMN_3187771	ILMN_1664071				ILMN_2183409
ILMN_1769288		ILMN_1728467	ILMN_1722025				ILMN_1706505
ILMN_1651229		ILMN_1749410	ILMN_1778357				ILMN_1805737
ILMN_1778173		ILMN_1689176	ILMN_2046611				ILMN_1685433
ILMN_2090782		ILMN_2151739	ILMN_1709399				ILMN_2386444
ILMN_1685978		ILMN_2376847	ILMN_2343264				ILMN_1772359
ILMN_1745887		ILMN_1787378	ILMN_2332250				ILMN_2148913
ILMN_1800468		ILMN_1788738	ILMN_3304200				ILMN_1689329
ILMN_2124361		ILMN_1677043	ILMN_2405254				ILMN_1656011
ILMN_1753913		ILMN_1765966	ILMN_1685441				ILMN_1774207
ILMN_2122420		ILMN_1777499	ILMN_2409062				ILMN_2379599
ILMN_1748979		ILMN_1802699	ILMN_2270802				ILMN_1695880
ILMN_1689431		ILMN_1740920	ILMN_1706483				ILMN_1723978
ILMN_1847494		ILMN_1697267	ILMN_1658071				ILMN_1815205
ILMN_1681670		ILMN_1672389	ILMN_2386982				ILMN_1809813
ILMN_1701918		ILMN_1718046	ILMN_1669393				ILMN_1713182
ILMN_2332250		ILMN_1687303	ILMN_1755649				ILMN_1785902
ILMN_1674908		ILMN_1705627	ILMN_1740917				ILMN_1722622
ILMN_1814296		ILMN_3245684	ILMN_1756701				ILMN_1671565
ILMN_1706690		ILMN_3244114	ILMN_1813561				ILMN_1691884
ILMN_1770085		ILMN_1740717	ILMN_1686464				ILMN_3266606
ILMN_2068747		ILMN_1670535	ILMN_1813400				ILMN_1687301
ILMN_1763852		ILMN_1774091	ILMN_1774091				ILMN_2149226
ILMN_1691846		ILMN_2352633	ILMN_1737387				ILMN_1673521
ILMN_1681634		ILMN_3289297	ILMN_1675325				ILMN_1656487
ILMN_1806634		ILMN_1788122	ILMN_1762718				ILMN_1770922
ILMN_1711888		ILMN_2368585	ILMN_1735432				ILMN_1747744
ILMN_1770940		ILMN_1663042	ILMN_1762764				ILMN_1796409
ILMN_3241087		ILMN_1689699	ILMN_1687768				ILMN_1760849
ILMN_1809842		ILMN_1713846	ILMN_1719351				ILMN_1744381
ILMN_2344204		ILMN_1804150	ILMN_1751941				ILMN_1659027
ILMN_3184670		ILMN_3268403	ILMN_1705627				ILMN_1725090
ILMN_1679041		ILMN_1803673	ILMN_1665831				ILMN_1674228
ILMN_1757807		ILMN_1662640	ILMN_2406299				ILMN_1752755
ILMN_1758404		ILMN_1803219	ILMN_1783337				ILMN_1787815
ILMN_1809495		ILMN_2155322	ILMN_2090782				ILMN_1718866
ILMN_2066088		ILMN_1680032	ILMN_3239861				ILMN_2393765
ILMN_1744299		ILMN_1743361	ILMN_2316878				ILMN_2104356
		ILMN_1730809	ILMN_1745491				ILMN_1699214
		ILMN_2057220	ILMN_3243011				ILMN_1813206
		ILMN_1758404	ILMN_3268472				ILMN_1765796
		ILMN_1729142	ILMN_2232936				ILMN_1789007
		ILMN_2407824	ILMN_1665095				ILMN_1701308
		ILMN_1660727	ILMN_1798546				ILMN_1739508
		ILMN_1760412	ILMN_2352633				ILMN_3240375
		ILMN_1712112	ILMN_1697793				ILMN_1680274
		ILMN_1806533	ILMN_2381397				ILMN_1804601
		ILMN_1779882	ILMN_1680925				ILMN_2364022
		ILMN_1803676	ILMN_2399300				ILMN_2315044
			ILMN_1807095				ILMN_1715508
			ILMN_1774062				ILMN_1659990
			ILMN_1725852				ILMN_1652199
			ILMN_1786720				ILMN_1663866
			ILMN_1757370				ILMN_1697189
			ILMN_1674135				ILMN_1746085
			ILMN_1740604				ILMN_2396875
			ILMN_1788738				ILMN_1707727
			ILMN_1773228				ILMN_1745299
			ILMN_1745702				ILMN_1685608
			ILMN_1718924				ILMN_1725139
			ILMN_1673113				ILMN_1756573
			ILMN_1794132
			ILMN_1669046
			ILMN_1710000
			ILMN_3238680
			ILMN_1735552
			ILMN_1784283
			ILMN_2102069
			ILMN_1791728
			ILMN_1831106
			ILMN_1780132
			ILMN_1804798
			ILMN_1713846
			ILMN_1694075
			ILMN_2066124
			ILMN_1674522
			ILMN_1806634
			ILMN_1662331
			ILMN_2323801
			ILMN_1730054
			ILMN_2304495
			ILMN_1687864
			ILMN_1660729
			ILMN_2352609
			ILMN_1778924
			ILMN_1746819
			ILMN_1710752
			ILMN_1743361
			ILMN_1702633
			ILMN_1794643
			ILMN_1815719
			ILMN_1790603
			ILMN_1794863
			ILMN_1674908
			ILMN_3306852
			ILMN_1723436
			ILMN_2120695
			ILMN_1812721
			ILMN_1657862
			ILMN_1785570
			ILMN_2305112
			ILMN_1737025
			ILMN_1742887
			ILMN_1811278
			ILMN_1752199
			ILMN_1772302
			ILMN_1738346
			ILMN_1856533
			ILMN_1796235
			ILMN_2413833
			ILMN_1756826
			ILMN_1691410
			ILMN_2098743
			ILMN_1732127
			ILMN_1674160
			ILMN_1709348
			ILMN_2406654
			ILMN_2153916
			ILMN_1705172
			ILMN_1810514
			ILMN_1727479
			ILMN_2180885
			ILMN_1798841
			ILMN_1770719
			ILMN_1671478
			ILMN_2309245
			ILMN_1658498
			ILMN_1739274
			ILMN_1802699
			ILMN_1714335
			ILMN_1712314
			ILMN_1807667
			ILMN_1773006
			ILMN_1684461
			ILMN_1744211
			ILMN_3184670
			ILMN_1809437
			ILMN_1685062
			ILMN_3297898
			ILMN_1840316
			ILMN_3251155
			ILMN_2406410
			ILMN_2412294
			ILMN_1769288
			ILMN_1711516
			ILMN_1793360
			ILMN_2410713
			ILMN_3236481
			ILMN_1686531
			ILMN_1772369
			ILMN_1727080
			ILMN_1752793
			ILMN_2403237
			ILMN_2407824
			ILMN_2119945
			ILMN_1698487
			ILMN_2392189
			ILMN_1652846
			ILMN_2406656
			ILMN_2363634
			ILMN_2052871
			ILMN_2372082
			ILMN_2041190
			ILMN_1721106
			ILMN_2141118
			ILMN_3261811
			ILMN_1801348
			ILMN_2172755
			ILMN_1697317
			ILMN_1720113
			ILMN_2254962
			ILMN_1707137
			ILMN_2094856
			ILMN_1652806
			ILMN_1734676
			ILMN_2384122
			ILMN_1764228
			ILMN_1665856
			ILMN_1653200
			ILMN_1715963
			ILMN_1685978
			ILMN_2367239
			ILMN_1814120
			ILMN_1711311
			ILMN_1720941
			ILMN_1750674
			ILMN_1701413
			ILMN_1780671
			ILMN_1764166
			ILMN_1755215
			ILMN_1739429
			ILMN_1761804
			ILMN_1735762
			ILMN_1729439
			ILMN_1795007
			ILMN_1690327
			ILMN_2376847
			ILMN_2183692
			ILMN_2094952
			ILMN_2144401
			ILMN_2228780
			ILMN_1756898
			ILMN_1745570
			ILMN_1724832
			ILMN_1793522
			ILMN_2068747
			ILMN_1807540
			ILMN_2209238
			ILMN_1777759
			ILMN_1730740
			ILMN_1726980
			ILMN_2414268
			ILMN_1795906
			ILMN_1675656
			ILMN_1651568
			ILMN_2255256
			ILMN_1689699
			ILMN_1674574
			ILMN_3237448
			ILMN_1775703
			ILMN_1654441
			ILMN_2112474
			ILMN_1737992
			ILMN_2216918
			ILMN_1786105
			ILMN_1712786
			ILMN_2374687
			ILMN_1774387
			ILMN_1794349
			ILMN_2046896
			ILMN_3290800
			ILMN_1723042
			ILMN_1687785
			ILMN_2388263
			ILMN_1705849
			ILMN_2144088
			ILMN_1765966
			ILMN_3244070
			ILMN_1696254
			ILMN_1729142
			ILMN_2341548
			ILMN_2064898
			ILMN_1733869
			ILMN_1728742
			ILMN_2402463
			ILMN_3271092
			ILMN_1659544
			ILMN_1663437
			ILMN_3223826
			ILMN_2118229
			ILMN_1677607
			ILMN_1736015
			ILMN_1662161
			ILMN_1785424
			ILMN_1740169
			ILMN_1757882
			ILMN_2348093
			ILMN_3238511
			ILMN_1764266
			ILMN_3245038
			ILMN_1794595
			ILMN_2351638
			ILMN_1728999
			ILMN_1737604
			ILMN_2373515
			ILMN_1690034
			ILMN_3248403
			ILMN_1680251
			ILMN_1712430
			ILMN_2230016
			ILMN_1813544
			ILMN_1772929
			ILMN_2047511
			ILMN_1766918
			ILMN_1786718
			ILMN_1758404
			ILMN_1684289
			ILMN_2323366
			ILMN_1692664
			ILMN_2362847
			ILMN_1736976
			ILMN_1654010
			ILMN_1781010
			ILMN_1765574
			ILMN_1760174
			ILMN_1770031
			ILMN_1660732
			ILMN_3242551
			ILMN_1783805
			ILMN_2079285
			ILMN_1741204
			ILMN_2050790
			ILMN_1720034
			ILMN_2064725
			ILMN_1807652
			ILMN_1783681
			ILMN_1656537
			ILMN_1745079
			ILMN_1785549
			ILMN_1771120
			ILMN_1769451
			ILMN_3248882
			ILMN_1804593
			ILMN_1772132
			ILMN_2191428
